# Supplementary material for: An LED-based multi-actinic illumination system for the high throughput study of photosynthetic light responses
Source: PeerJ. 2018 Sep 4;6:e5589. doi: 10.7717/peerj.5589 (PMC6128260; doi:10.7717/peerj.5589)
Supplement: Data S1 [file peerj-06-5589-s009.xlsx]

## Sheet: Fig 3A
LED no	PMW	G	R	B	W	RGBW
14	0	0	0	0	0	0
14	36.653	38.809	34.2094	55.6263	163.717	280.144
14	73.0441	77.3409	68.1745	110.855	326.264	558.286
14	110.221	116.704	102.873	167.276	492.319	842.432
14	146.088	154.682	136.349	221.71	652.528	1116.57
14	182.61	193.352	170.436	277.138	815.66	1395.72
14	217.954	230.775	203.424	330.778	973.529	1665.85
14	255	270	238	387	1139	1949
28	0	0	0	0	0	0
28	36	39.0882	34.4555	56.0265	164.894	282.159
28	72	77.8972	68.665	111.653	328.611	562.303
28	109	117.544	103.613	168.48	495.861	848.493
28	145	155.158	136.769	222.393	654.537	1120.01
28	182	193.947	170.961	277.991	818.171	1400.01
28	218	231.486	204.05	331.796	976.526	1670.98
28	255	270.831	238.733	388.191	1142.51	1955
35	0	0	0	0	0	0
35	36	39.668	34.9667	56.8575	167.34	286.345
35	72	79.0528	69.6835	113.309	333.486	570.644
35	109	119.287	105.15	170.979	503.216	861.079
35	145	157.459	138.798	225.692	664.246	1136.62
35	182	196.824	173.497	282.115	830.307	1420.78
35	218	234.919	207.077	336.718	991.012	1695.77
35	255	274.849	242.274	393.95	1159.45	1984
50	0	0	0	0	0	0
50	36	38.6284	34.0502	55.3673	162.954	278.84
50	72	76.9808	67.8572	110.339	324.745	555.687
50	109	116.161	102.394	166.497	490.027	838.51
50	145	153.333	135.16	219.777	646.836	1106.83
50	182	191.666	168.95	274.721	808.545	1383.54
50	218	228.762	201.65	327.893	965.038	1651.32
50	255	267.645	235.924	383.624	1129.07	1932
58	0	0	0	0	0	0
58	36	38.5884	34.0149	55.31	162.786	278.551
58	72	76.9011	67.7869	110.225	324.409	555.112
58	109	116.041	102.288	166.325	489.52	837.642
58	145	153.174	135.02	219.549	646.166	1105.69
58	182	191.467	168.775	274.436	807.708	1382.11
58	218	228.525	201.441	327.553	964.039	1649.61
58	255	267.368	235.68	383.227	1127.9	1930

## Sheet: Fig 3B
Wavelenght (nm)	B	G	R	W	RGBW
187.275	-8.63	-66.27	-2.05	37.01	-56.9
187.74	-8.63	-66.27	-2.05	37.01	-56.9
188.205	-8.63	-66.27	-2.05	37.01	-56.9
188.671	19.46	-17.12	-90.99	-56.61	-35.84
189.136	-106.93	-5.41	-69.92	-80.02	-59.24
189.601	14.77	-70.95	-112.05	-96.4	-108.4
190.066	-55.44	-101.37	-60.56	-14.48	-92.01
190.532	-22.67	-101.37	-6.73	-37.89	-19.46
190.997	-50.76	-159.89	-25.45	-26.18	-47.54
191.462	-48.42	-49.88	-98.01	-65.97	-49.88
191.927	-39.06	-96.69	-53.54	-49.59	-63.93
192.392	-36.72	-42.86	-46.52	-70.65	-47.54
192.857	-20.33	27.36	-34.82	-96.4	3.95
193.322	-20.33	22.67	-2.05	-14.48	-33.5
193.786	-6.29	48.42	23.7	6.58	10.97
194.251	-39.06	81.19	35.4	34.67	69.48
194.716	52.22	123.32	77.53	18.29	41.4
195.181	96.69	64.8	16.68	25.31	71.83
195.646	35.84	48.42	107.96	177.44	142.04
196.11	66.27	74.17	84.55	123.61	46.08
196.575	73.29	132.68	93.91	86.16	76.51
197.04	176.27	181.83	171.15	86.16	95.23
197.504	183.29	163.11	117.32	165.74	90.55
197.969	157.55	163.11	154.77	273.4	163.11
198.433	202.02	205.24	222.64	266.38	280.13
198.898	241.81	219.28	269.45	303.83	331.62
199.362	293.3	287.15	227.32	360	284.81
199.826	265.21	212.26	299.88	381.07	291.84
200.291	288.62	202.9	304.56	355.32	315.24
200.755	204.36	242.68	220.3	345.96	298.86
201.219	279.26	301.2	271.79	383.41	338.65
201.684	309.68	245.02	255.41	430.22	357.37
202.148	276.91	338.65	311.58	423.2	340.99
202.612	265.21	310.56	318.61	413.84	371.41
203.076	335.43	373.75	342.01	451.28	359.71
203.54	335.43	350.35	306.9	437.24	364.39
204.004	295.64	326.94	344.35	427.88	340.99
204.468	335.43	364.39	306.9	462.99	380.78
204.932	361.17	383.12	297.54	467.67	399.5
205.396	335.43	397.16	318.61	472.35	366.73
205.86	372.88	329.28	299.88	395.11	383.12
206.324	424.37	340.99	356.05	427.88	422.91
206.788	321.38	359.71	295.2	392.77	460.35
207.251	316.7	411.2	351.37	409.15	418.22
207.715	368.2	310.56	353.71	430.22	364.39
208.179	363.51	355.03	306.9	453.63	411.2
208.642	342.45	310.56	344.35	413.84	322.26
209.106	379.9	333.97	374.78	427.88	378.44
209.57	368.2	443.97	370.1	395.11	399.5
210.033	319.04	364.39	332.65	343.62	359.71
210.497	326.07	397.16	374.78	477.03	369.07
210.96	358.83	401.84	351.37	420.86	404.18
211.424	321.38	338.65	339.67	395.11	446.31
211.887	347.13	357.37	304.56	397.45	422.91
212.35	361.17	378.44	323.29	390.43	394.82
212.814	293.3	324.6	349.03	455.97	338.65
213.277	319.04	303.54	276.48	390.43	392.48
213.74	323.73	298.86	297.54	411.5	394.82
214.203	356.49	284.81	379.46	430.22	312.9
214.667	335.43	362.05	281.16	357.66	397.16
215.13	342.45	357.37	311.58	385.75	392.48
215.593	314.36	394.82	342.01	437.24	373.75
216.056	326.07	378.44	295.2	432.56	401.84
216.519	328.41	273.11	304.56	320.21	394.82
216.982	340.11	287.15	288.18	411.5	333.97
217.445	372.88	312.9	260.09	383.41	373.75
217.908	307.34	326.94	342.01	423.2	397.16
218.37	349.47	348.01	215.62	308.51	415.88
218.833	342.45	331.62	299.88	374.05	378.44
219.296	356.49	291.84	323.29	441.92	394.82
219.759	312.02	282.47	337.33	348.3	336.31
220.221	302.66	275.45	309.24	402.13	371.41
220.684	351.81	350.35	339.67	367.03	315.24
221.147	297.98	338.65	377.12	381.07	376.09
221.609	286.28	350.35	342.01	383.41	397.16
222.072	403.3	392.48	353.71	392.77	364.39
222.534	337.77	357.37	236.69	423.2	371.41
222.997	363.51	273.11	330.31	411.5	422.91
223.459	316.7	298.86	339.67	371.71	369.07
223.922	307.34	301.2	309.24	404.47	362.05
224.384	323.73	266.09	304.56	451.28	345.67
224.846	300.32	359.71	306.9	420.86	376.09
225.309	288.62	350.35	269.45	390.43	387.8
225.771	340.11	401.84	246.05	413.84	319.92
226.233	326.07	350.35	306.9	369.37	357.37
226.695	349.47	333.97	323.29	462.99	397.16
227.157	244.15	263.75	318.61	423.2	383.12
227.619	307.34	371.41	271.79	409.15	380.78
228.081	347.13	303.54	339.67	397.45	345.67
228.543	344.79	338.65	398.18	360	359.71
229.005	295.64	362.05	285.84	434.9	366.73
229.467	328.41	312.9	320.95	416.18	345.67
229.929	326.07	305.88	358.39	390.43	376.09
230.391	309.68	268.43	377.12	425.54	359.71
230.853	349.47	336.31	313.92	472.35	413.54
231.315	302.66	259.07	281.16	411.5	359.71
231.776	309.68	362.05	278.82	416.18	312.9
232.238	340.11	301.2	372.44	446.6	364.39
232.7	319.04	371.41	339.67	355.32	319.92
233.161	305	345.67	267.11	397.45	364.39
233.623	347.13	287.15	353.71	441.92	348.01
234.084	290.96	362.05	327.97	360	408.86
234.546	314.36	326.94	313.92	409.15	406.52
235.007	337.77	310.56	344.35	376.39	345.67
235.469	307.34	270.77	313.92	458.31	340.99
235.93	319.04	338.65	285.84	425.54	322.26
236.391	290.96	296.52	330.31	439.58	427.59
236.853	330.75	303.54	281.16	427.88	333.97
237.314	342.45	359.71	281.16	434.9	359.71
237.775	344.79	359.71	304.56	474.69	385.46
238.236	351.81	359.71	323.29	416.18	450.99
238.697	290.96	399.5	372.44	357.66	413.54
239.159	295.64	333.97	241.37	446.6	366.73
239.62	354.15	380.78	302.22	425.54	399.5
240.081	335.43	301.2	276.48	352.98	392.48
240.542	321.38	362.05	304.56	416.18	317.58
241.003	305	357.37	295.2	453.63	378.44
241.463	321.38	352.69	337.33	385.75	355.03
241.924	326.07	408.86	353.71	444.26	390.14
242.385	335.43	322.26	281.16	484.05	369.07
242.846	323.73	324.6	290.52	406.81	411.2
243.307	293.3	317.58	384.14	434.9	366.73
243.767	361.17	385.46	386.48	467.67	331.62
244.228	410.33	343.33	337.33	402.13	394.82
244.689	307.34	324.6	339.67	446.6	385.46
245.149	363.51	413.54	302.22	388.09	369.07
245.61	356.49	345.67	372.44	448.94	387.8
246.07	368.2	312.9	274.14	418.52	427.59
246.531	260.53	329.28	353.71	399.79	411.2
246.991	293.3	357.37	334.99	432.56	359.71
247.451	368.2	298.86	325.63	462.99	380.78
247.912	347.13	359.71	360.74	423.2	376.09
248.372	244.15	296.52	334.99	455.97	432.27
248.832	358.83	369.07	332.65	432.56	364.39
249.293	323.73	369.07	318.61	406.81	324.6
249.753	323.73	322.26	323.29	425.54	404.18
250.213	356.49	366.73	299.88	448.94	331.62
250.673	347.13	380.78	346.69	437.24	369.07
251.133	323.73	385.46	370.1	453.63	369.07
251.593	349.47	366.73	278.82	392.77	399.5
252.053	368.2	333.97	253.07	350.64	355.03
252.513	379.9	317.58	325.63	437.24	315.24
252.973	337.77	324.6	283.5	413.84	371.41
253.433	368.2	336.31	267.11	397.45	366.73
253.893	351.81	364.39	327.97	432.56	380.78
254.352	314.36	390.14	339.67	411.5	322.26
254.812	405.64	308.22	318.61	381.07	315.24
255.272	351.81	352.69	292.86	439.58	380.78
255.732	328.41	326.94	313.92	444.26	289.5
256.191	377.56	312.9	377.12	481.71	394.82
256.651	354.15	362.05	391.16	334.26	376.09
257.11	333.09	340.99	367.76	381.07	427.59
257.57	372.88	338.65	353.71	399.79	343.33
258.029	309.68	270.77	318.61	420.86	378.44
258.489	323.73	404.18	320.95	495.75	345.67
258.948	335.43	366.73	337.33	376.39	364.39
259.407	368.2	390.14	278.82	441.92	413.54
259.867	340.11	238	253.07	390.43	371.41
260.326	389.26	336.31	334.99	474.69	404.18
260.785	424.37	397.16	358.39	465.33	340.99
261.244	326.07	364.39	330.31	416.18	383.12
261.703	305	315.24	323.29	453.63	331.62
262.163	333.09	296.52	405.21	465.33	404.18
262.622	363.51	331.62	365.42	437.24	425.25
263.081	379.9	329.28	334.99	418.52	446.31
263.54	335.43	326.94	325.63	322.56	378.44
263.999	297.98	343.33	370.1	411.5	343.33
264.457	321.38	324.6	320.95	371.71	340.99
264.916	400.96	333.97	353.71	399.79	460.35
265.375	316.7	317.58	393.5	409.15	418.22
265.834	330.75	289.5	370.1	486.39	394.82
266.293	241.81	357.37	327.97	437.24	385.46
266.751	323.73	296.52	363.08	423.2	376.09
267.21	368.2	338.65	285.84	427.88	411.2
267.669	340.11	392.48	325.63	418.52	432.27
268.127	356.49	280.13	285.84	460.65	486.1
268.586	391.6	411.2	302.22	395.11	439.29
269.044	429.05	408.86	257.75	439.58	420.57
269.503	333.09	364.39	304.56	427.88	383.12
269.961	384.58	345.67	346.69	451.28	401.84
270.419	361.17	359.71	379.46	383.41	340.99
270.878	372.88	378.44	400.52	448.94	336.31
271.336	349.47	432.27	299.88	484.05	429.93
271.794	363.51	364.39	281.16	381.07	401.84
272.252	337.77	369.07	349.03	406.81	373.75
272.711	326.07	348.01	309.24	465.33	366.73
273.169	354.15	338.65	327.97	493.41	406.52
273.627	323.73	326.94	306.9	465.33	429.93
274.085	335.43	340.99	428.61	460.65	378.44
274.543	328.41	376.09	288.18	434.9	387.8
275.001	307.34	411.2	274.14	437.24	364.39
275.459	316.7	373.75	363.08	498.1	446.31
275.917	391.6	392.48	285.84	451.28	373.75
276.374	326.07	366.73	342.01	425.54	390.14
276.832	361.17	317.58	351.37	430.22	404.18
277.29	391.6	350.35	377.12	385.75	322.26
277.748	302.66	331.62	304.56	434.9	418.22
278.205	293.3	401.84	327.97	481.71	359.71
278.663	386.92	340.99	323.29	420.86	390.14
279.121	274.57	289.5	299.88	395.11	378.44
279.578	349.47	315.24	311.58	448.94	418.22
280.036	328.41	296.52	365.42	462.99	324.6
280.493	379.9	378.44	320.95	444.26	413.54
280.951	305	366.73	365.42	376.39	408.86
281.408	314.36	331.62	302.22	458.31	380.78
281.865	361.17	319.92	288.18	460.65	366.73
282.323	384.58	315.24	316.26	420.86	436.95
282.78	415.01	343.33	339.67	397.45	340.99
283.237	307.34	369.07	264.77	406.81	366.73
283.694	330.75	366.73	269.45	465.33	371.41
284.151	335.43	401.84	332.65	402.13	392.48
284.609	375.22	268.43	370.1	455.97	352.69
285.066	370.54	352.69	344.35	472.35	371.41
285.523	316.7	394.82	302.22	491.07	443.97
285.98	403.3	331.62	356.05	404.47	376.09
286.437	372.88	350.35	313.92	465.33	439.29
286.893	333.09	418.22	309.24	446.6	348.01
287.35	344.79	357.37	360.74	360	338.65
287.807	396.28	411.2	367.76	378.73	362.05
288.264	337.77	343.33	363.08	477.03	373.75
288.721	415.01	315.24	342.01	493.41	397.16
289.177	354.15	329.28	372.44	451.28	397.16
289.634	382.24	326.94	356.05	467.67	406.52
290.09	314.36	331.62	344.35	477.03	418.22
290.547	356.49	385.46	402.86	441.92	448.65
291.004	347.13	366.73	374.78	465.33	436.95
291.46	340.11	340.99	318.61	458.31	315.24
291.916	372.88	401.84	325.63	479.37	427.59
292.373	452.45	385.46	407.55	455.97	390.14
292.829	393.94	359.71	320.95	374.05	397.16
293.286	351.81	364.39	344.35	432.56	418.22
293.742	379.9	338.65	292.86	432.56	446.31
294.198	349.47	326.94	313.92	477.03	413.54
294.654	337.77	415.88	342.01	446.6	357.37
295.11	450.11	366.73	358.39	409.15	399.5
295.566	372.88	415.88	351.37	467.67	441.63
296.022	400.96	322.26	297.54	458.31	413.54
296.478	370.54	387.8	318.61	484.05	411.2
296.934	445.43	394.82	318.61	409.15	411.2
297.39	337.77	373.75	344.35	488.73	371.41
297.846	330.75	301.2	313.92	484.05	345.67
298.302	405.64	343.33	370.1	413.84	406.52
298.758	330.75	357.37	330.31	427.88	448.65
299.214	349.47	340.99	334.99	367.03	406.52
299.669	375.22	383.12	295.2	388.09	432.27
300.125	356.49	359.71	374.78	395.11	340.99
300.581	319.04	371.41	370.1	462.99	450.99
301.036	375.22	378.44	405.21	432.56	443.97
301.492	300.32	352.69	313.92	378.73	371.41
301.947	337.77	406.52	388.82	434.9	411.2
302.403	398.62	352.69	353.71	434.9	418.22
302.858	370.54	390.14	299.88	434.9	369.07
303.314	314.36	315.24	367.76	425.54	352.69
303.769	328.41	362.05	313.92	402.13	408.86
304.224	333.09	348.01	370.1	453.63	439.29
304.68	330.75	338.65	374.78	448.94	376.09
305.135	377.56	296.52	349.03	430.22	371.41
305.59	368.2	366.73	330.31	462.99	390.14
306.045	337.77	399.5	309.24	451.28	408.86
306.5	396.28	429.93	356.05	434.9	392.48
306.955	351.81	364.39	325.63	460.65	434.61
307.41	300.32	254.39	283.5	418.52	301.2
307.865	365.85	364.39	278.82	453.63	408.86
308.32	375.22	357.37	381.8	448.94	432.27
308.775	370.54	378.44	363.08	420.86	355.03
309.23	363.51	383.12	309.24	402.13	319.92
309.685	248.83	308.22	339.67	441.92	373.75
310.139	323.73	345.67	393.5	439.58	441.63
310.594	398.62	359.71	393.5	423.2	420.57
311.049	354.15	366.73	342.01	432.56	373.75
311.503	400.96	369.07	344.35	432.56	453.33
311.958	391.6	397.16	358.39	453.63	387.8
312.413	358.83	331.62	325.63	479.37	434.61
312.867	340.11	352.69	419.25	472.35	406.52
313.322	368.2	340.99	398.18	434.9	345.67
313.776	265.21	324.6	393.5	477.03	362.05
314.23	297.98	357.37	372.44	425.54	422.91
314.685	393.94	366.73	318.61	477.03	366.73
315.139	305	371.41	370.1	434.9	427.59
315.593	393.94	408.86	304.56	462.99	345.67
316.047	361.17	394.82	386.48	465.33	469.72
316.502	410.33	298.86	346.69	514.48	383.12
316.956	403.3	350.35	334.99	451.28	378.44
317.41	335.43	310.56	374.78	383.41	366.73
317.864	379.9	380.78	398.18	472.35	401.84
318.318	377.56	397.16	358.39	465.33	336.31
318.772	349.47	289.5	400.52	451.28	378.44
319.226	375.22	408.86	332.65	439.58	413.54
319.68	377.56	340.99	325.63	484.05	387.8
320.133	400.96	348.01	332.65	472.35	378.44
320.587	379.9	394.82	358.39	484.05	387.8
321.041	351.81	359.71	370.1	481.71	427.59
321.495	276.91	366.73	398.18	427.88	392.48
321.948	295.64	352.69	327.97	432.56	385.46
322.402	415.01	364.39	421.59	453.63	404.18
322.855	358.83	350.35	349.03	413.84	399.5
323.309	377.56	390.14	360.74	481.71	394.82
323.762	354.15	359.71	351.37	446.6	397.16
324.216	358.83	329.28	330.31	397.45	392.48
324.669	407.98	336.31	363.08	392.77	359.71
325.123	337.77	390.14	334.99	458.31	427.59
325.576	347.13	319.92	374.78	453.63	350.35
326.029	386.92	362.05	393.5	385.75	352.69
326.482	370.54	392.48	381.8	467.67	411.2
326.935	391.6	397.16	374.78	470.01	385.46
327.389	333.09	324.6	309.24	441.92	408.86
327.842	389.26	336.31	363.08	486.39	371.41
328.295	361.17	352.69	363.08	477.03	385.46
328.748	386.92	331.62	360.74	502.78	373.75
329.201	415.01	333.97	349.03	523.84	378.44
329.654	391.6	352.69	353.71	453.63	394.82
330.107	340.11	312.9	318.61	526.18	390.14
330.559	386.92	366.73	295.2	432.56	345.67
331.012	262.87	380.78	365.42	390.43	387.8
331.465	417.35	408.86	339.67	446.6	348.01
331.918	307.34	329.28	290.52	430.22	364.39
332.37	309.68	376.09	344.35	378.73	385.46
332.823	356.49	411.2	370.1	383.41	420.57
333.275	356.49	343.33	353.71	441.92	390.14
333.728	386.92	329.28	353.71	437.24	448.65
334.18	391.6	383.12	330.31	432.56	392.48
334.633	347.13	355.03	346.69	374.05	401.84
335.085	384.58	359.71	327.97	460.65	434.61
335.538	333.09	436.95	327.97	453.63	348.01
335.99	365.85	401.84	332.65	474.69	434.61
336.442	349.47	373.75	330.31	444.26	429.93
336.894	375.22	355.03	358.39	470.01	448.65
337.347	403.3	315.24	339.67	444.26	371.41
337.799	344.79	362.05	386.48	406.81	429.93
338.251	379.9	434.61	398.18	455.97	390.14
338.703	403.3	453.33	353.71	439.58	439.29
339.155	337.77	392.48	409.89	416.18	415.88
339.607	361.17	399.5	320.95	420.86	371.41
340.059	326.07	399.5	325.63	411.5	401.84
340.511	400.96	376.09	332.65	540.22	357.37
340.963	384.58	427.59	323.29	455.97	355.03
341.414	347.13	387.8	299.88	477.03	385.46
341.866	377.56	390.14	381.8	502.78	380.78
342.318	400.96	385.46	342.01	455.97	401.84
342.769	358.83	373.75	342.01	470.01	378.44
343.221	393.94	348.01	388.82	484.05	458.01
343.673	333.09	352.69	377.12	371.71	462.69
344.124	319.04	408.86	295.2	465.33	446.31
344.576	410.33	383.12	342.01	446.6	383.12
345.027	361.17	336.31	295.2	392.77	488.44
345.478	323.73	298.86	365.42	470.01	312.9
345.93	354.15	371.41	391.16	404.47	413.54
346.381	314.36	291.84	356.05	441.92	441.63
346.832	330.75	373.75	356.05	470.01	387.8
347.284	354.15	355.03	342.01	409.15	359.71
347.735	386.92	383.12	358.39	528.52	408.86
348.186	358.83	413.54	370.1	402.13	373.75
348.637	354.15	350.35	400.52	374.05	383.12
349.088	403.3	355.03	363.08	481.71	394.82
349.539	410.33	340.99	416.91	526.18	436.95
349.99	422.03	378.44	358.39	472.35	362.05
350.441	375.22	434.61	346.69	409.15	439.29
350.892	396.28	371.41	379.46	385.75	429.93
351.343	412.67	303.54	379.46	388.09	397.16
351.793	358.83	441.63	384.14	444.26	404.18
352.244	347.13	357.37	377.12	434.9	362.05
352.695	379.9	413.54	353.71	465.33	355.03
353.146	361.17	357.37	327.97	397.45	439.29
353.596	361.17	348.01	332.65	500.44	366.73
354.047	314.36	336.31	311.58	430.22	322.26
354.497	384.58	340.99	330.31	481.71	362.05
354.948	372.88	401.84	295.2	479.37	383.12
355.398	368.2	364.39	381.8	458.31	434.61
355.848	279.26	336.31	402.86	345.96	387.8
356.299	363.51	369.07	409.89	455.97	427.59
356.749	319.04	352.69	292.86	369.37	399.5
357.199	326.07	326.94	346.69	402.13	392.48
357.65	365.85	312.9	318.61	479.37	497.8
358.1	344.79	331.62	344.35	437.24	376.09
358.55	363.51	329.28	337.33	432.56	394.82
359	389.26	343.33	391.16	453.63	338.65
359.45	386.92	401.84	367.76	446.6	373.75
359.9	431.39	418.22	288.18	495.75	364.39
360.35	363.51	338.65	407.55	409.15	369.07
360.8	321.38	387.8	358.39	378.73	439.29
361.25	438.41	333.97	370.1	509.8	453.33
361.699	389.26	326.94	349.03	474.69	397.16
362.149	398.62	394.82	295.2	441.92	383.12
362.599	283.94	336.31	327.97	427.88	376.09
363.049	384.58	362.05	386.48	425.54	406.52
363.498	377.56	390.14	379.46	509.8	376.09
363.948	372.88	434.61	316.26	470.01	404.18
364.397	433.73	373.75	356.05	444.26	383.12
364.847	398.62	340.99	405.21	432.56	397.16
365.296	412.67	371.41	391.16	416.18	408.86
365.746	403.3	376.09	309.24	411.5	453.33
366.195	354.15	357.37	337.33	477.03	383.12
366.644	333.09	373.75	334.99	430.22	378.44
367.094	400.96	427.59	386.48	444.26	394.82
367.543	319.04	408.86	313.92	477.03	385.46
367.992	412.67	369.07	334.99	409.15	366.73
368.441	391.6	378.44	349.03	418.52	397.16
368.89	283.94	415.88	379.46	432.56	390.14
369.339	405.64	376.09	391.16	472.35	443.97
369.788	337.77	366.73	332.65	437.24	387.8
370.237	417.35	394.82	393.5	502.78	373.75
370.686	363.51	319.92	405.21	409.15	418.22
371.135	384.58	362.05	402.86	420.86	404.18
371.584	351.81	406.52	360.74	481.71	455.67
372.033	347.13	317.58	323.29	441.92	399.5
372.482	358.83	364.39	381.8	427.88	392.48
372.93	396.28	411.2	349.03	315.53	408.86
373.379	487.56	376.09	349.03	470.01	434.61
373.827	386.92	404.18	342.01	439.58	455.67
374.276	398.62	392.48	412.23	406.81	432.27
374.725	384.58	359.71	379.46	432.56	429.93
375.173	356.49	369.07	386.48	451.28	376.09
375.621	314.36	415.88	367.76	467.67	385.46
376.07	398.62	345.67	346.69	399.79	460.35
376.518	386.92	364.39	339.67	411.5	369.07
376.966	412.67	413.54	421.59	430.22	429.93
377.415	319.04	376.09	381.8	416.18	443.97
377.863	349.47	319.92	386.48	470.01	467.38
378.311	400.96	303.54	367.76	502.78	420.57
378.759	276.91	331.62	274.14	484.05	385.46
379.207	407.98	317.58	320.95	465.33	429.93
379.655	365.85	345.67	360.74	388.09	390.14
380.103	365.85	411.2	353.71	467.67	373.75
380.551	377.56	362.05	372.44	540.22	425.25
380.999	344.79	329.28	344.35	516.82	411.2
381.447	400.96	383.12	409.89	352.98	439.29
381.895	337.77	406.52	388.82	448.94	399.5
382.342	361.17	373.75	398.18	498.1	359.71
382.79	356.49	394.82	388.82	427.88	333.97
383.238	354.15	425.25	370.1	406.81	425.25
383.685	400.96	425.25	374.78	441.92	486.1
384.133	403.3	380.78	374.78	474.69	441.63
384.58	391.6	439.29	351.37	491.07	413.54
385.028	286.28	364.39	370.1	409.15	348.01
385.475	400.96	385.46	384.14	411.5	371.41
385.923	349.47	348.01	334.99	505.12	397.16
386.37	370.54	376.09	311.58	455.97	401.84
386.817	302.66	355.03	337.33	416.18	369.07
387.265	358.83	369.07	304.56	530.86	345.67
387.712	438.41	397.16	339.67	474.69	385.46
388.159	384.58	345.67	346.69	488.73	380.78
388.606	321.38	345.67	316.26	455.97	420.57
389.053	440.75	387.8	330.31	439.58	408.86
389.5	347.13	432.27	398.18	437.24	420.57
389.947	386.92	376.09	353.71	404.47	378.44
390.394	375.22	308.22	391.16	519.16	385.46
390.841	478.2	322.26	309.24	423.2	420.57
391.288	403.3	352.69	414.57	470.01	390.14
391.735	314.36	369.07	365.42	451.28	462.69
392.181	398.62	331.62	374.78	388.09	404.18
392.628	393.94	359.71	402.86	406.81	420.57
393.075	375.22	315.24	349.03	374.05	312.9
393.521	389.26	376.09	400.52	453.63	376.09
393.968	400.96	366.73	372.44	481.71	376.09
394.414	344.79	441.63	349.03	462.99	364.39
394.861	379.9	291.84	447.33	458.31	425.25
395.307	412.67	385.46	377.12	423.2	469.72
395.754	321.38	378.44	384.14	439.58	373.75
396.2	419.69	369.07	351.37	444.26	369.07
396.646	368.2	350.35	330.31	467.67	397.16
397.093	410.33	336.31	384.14	441.92	404.18
397.539	370.54	383.12	330.31	425.54	472.06
397.985	314.36	390.14	349.03	470.01	434.61
398.431	400.96	319.92	346.69	444.26	362.05
398.877	375.22	305.88	349.03	460.65	357.37
399.323	438.41	350.35	269.45	439.58	411.2
399.769	354.15	359.71	339.67	402.13	422.91
400.215	297.98	310.56	391.16	411.5	413.54
400.661	382.24	383.12	325.63	495.75	436.95
401.107	407.98	338.65	334.99	453.63	425.25
401.552	433.73	357.37	407.55	470.01	364.39
401.998	396.28	371.41	405.21	488.73	415.88
402.444	344.79	359.71	365.42	498.1	392.48
402.889	377.56	331.62	393.5	474.69	399.5
403.335	382.24	383.12	379.46	500.44	418.22
403.781	431.39	364.39	407.55	434.9	397.16
404.226	365.85	357.37	320.95	495.75	366.73
404.672	447.77	352.69	311.58	486.39	467.38
405.117	403.3	408.86	419.25	479.37	399.5
405.562	415.01	429.93	337.33	458.31	399.5
406.008	417.35	364.39	309.24	486.39	427.59
406.453	342.45	373.75	395.84	455.97	392.48
406.898	358.83	376.09	367.76	502.78	462.69
407.343	407.98	301.2	313.92	481.71	390.14
407.789	375.22	378.44	330.31	418.52	436.95
408.234	382.24	369.07	358.39	507.46	432.27
408.679	358.83	336.31	367.76	516.82	429.93
409.124	417.35	397.16	391.16	558.95	394.82
409.569	382.24	355.03	337.33	505.12	507.16
410.014	365.85	413.54	344.35	465.33	427.59
410.458	391.6	366.73	367.76	462.99	458.01
410.903	389.26	373.75	306.9	561.29	504.82
411.348	349.47	399.5	421.59	521.5	406.52
411.793	386.92	429.93	409.89	474.69	462.69
412.237	398.62	383.12	351.37	516.82	450.99
412.682	391.6	355.03	372.44	514.48	458.01
413.127	452.45	383.12	388.82	460.65	481.42
413.571	393.94	394.82	316.26	572.99	507.16
414.016	436.07	345.67	393.5	554.27	432.27
414.46	326.07	429.93	435.63	570.65	429.93
414.904	400.96	336.31	337.33	601.08	518.87
415.349	454.8	331.62	393.5	622.14	507.16
415.793	417.35	345.67	356.05	631.51	476.74
416.237	480.54	308.22	334.99	645.55	504.82
416.682	447.77	350.35	374.78	647.89	565.68
417.126	419.69	397.16	363.08	664.27	568.02
417.57	443.09	376.09	367.76	678.32	635.89
418.014	536.71	317.58	414.57	683	589.08
418.458	450.11	359.71	351.37	741.51	570.36
418.902	489.9	418.22	363.08	771.94	563.34
419.346	503.95	413.54	309.24	727.47	586.74
419.79	492.24	406.52	353.71	785.98	607.81
420.233	473.52	364.39	409.89	793	696.75
420.677	557.78	371.41	398.18	921.73	631.21
421.121	548.42	394.82	444.99	828.11	696.75
421.565	471.18	369.07	400.52	905.35	675.68
422.008	522.67	436.95	384.14	905.35	687.39
422.452	574.16	439.29	342.01	853.86	778.67
422.895	606.93	380.78	356.05	917.05	764.62
423.339	517.99	350.35	346.69	1015.35	848.88
423.782	623.31	390.14	435.63	933.43	790.37
424.226	686.51	343.33	358.39	998.97	797.39
424.669	637.36	322.26	360.74	1090.25	860.59
425.113	756.72	385.46	339.67	1116	839.52
425.556	707.57	352.69	391.16	1207.28	914.42
425.999	723.96	380.78	351.37	1195.57	909.74
426.442	754.38	427.59	395.84	1228.34	1075.92
426.885	791.83	422.91	426.27	1244.73	1038.47
427.328	925.24	369.07	372.44	1385.16	1139.11
427.771	939.29	376.09	365.42	1289.2	1153.15
428.214	965.03	333.97	356.05	1467.08	1300.61
428.657	943.97	301.2	353.71	1520.91	1211.67
429.1	1060.99	378.44	346.69	1546.66	1338.06
429.543	1117.17	399.5	318.61	1607.51	1316.99
429.986	1180.36	429.93	377.12	1710.49	1534.66
430.429	1241.22	348.01	437.97	1719.85	1548.7
430.871	1252.92	345.67	337.33	1890.71	1686.79
431.314	1479.95	366.73	358.39	2017.1	1796.8
431.757	1465.91	446.31	363.08	2028.81	1775.74
432.199	1639.11	443.97	349.03	2136.47	1927.87
432.642	1753.79	369.07	360.74	2304.99	2080
433.084	1781.88	369.07	320.95	2403.29	2269.59
433.527	1901.25	392.48	377.12	2630.32	2274.27
433.969	2081.47	333.97	374.78	2642.03	2520.03
434.411	2130.62	352.69	381.8	2831.61	2648.76
434.854	2233.6	385.46	313.92	3042.26	2737.7
435.296	2500.42	352.69	334.99	3203.75	2941.32
435.738	2617.45	322.26	367.76	3339.51	3187.08
436.18	2804.69	357.37	442.65	3599.31	3425.81
436.622	3031.73	404.18	309.24	3664.84	3444.54
437.064	3223.65	378.44	318.61	3980.81	3783.91
437.506	3558.35	319.92	346.69	4146.99	3936.05
437.948	3635.58	404.18	372.44	4336.57	4228.62
438.39	3996.03	392.48	339.67	4736.81	4516.5
438.832	4286.25	364.39	311.58	4886.6	4825.45
439.274	4555.41	362.05	358.39	5275.13	5054.83
439.715	4775.42	322.26	419.25	5427.26	5487.82
440.157	5093.74	317.58	379.46	5766.64	5768.69
440.599	5526.74	392.48	339.67	6152.83	6189.99
441.04	5840.37	406.52	358.39	6400.93	6672.14
441.482	6186.77	441.63	339.67	7007.13	6922.57
441.924	6610.4	376.09	327.97	7234.16	7343.87
442.365	7017.66	392.48	313.92	7791.2	7821.34
442.806	7630.88	397.16	344.35	8308.46	8457.96
443.248	7956.21	385.46	367.76	8685.29	8750.53
443.689	8574.11	434.61	400.52	9534.9	9396.52
444.13	9082.01	387.8	381.8	9855.56	10140.8
444.572	9711.61	378.44	416.91	10405.6	10543.4
445.013	10388	352.69	342.01	11341.8	11269
445.454	10961.5	350.35	381.8	12065	12116.2
445.895	11598.1	343.33	379.46	12619.7	12584.3
446.336	12077.9	422.91	360.74	13408.5	13260.7
446.777	13220.1	352.69	290.52	14267.5	14370.2
447.218	13681.2	418.22	365.42	15147.5	14868.7
447.659	14739.1	418.22	370.1	16039.2	16083.4
448.1	15394.4	404.18	299.88	17158	16935.4
448.54	16187.9	369.07	430.95	18120	17822.5
448.981	17142.8	348.01	278.82	19119.4	18826.5
449.422	18359.9	385.46	372.44	20402	20006.2
449.863	19558.2	408.86	360.74	21471.6	21288.8
450.303	20288.5	373.75	330.31	22742.5	22070.5
450.744	21327.7	418.22	363.08	24439.4	23425.7
451.184	22853.7	369.07	313.92	25614.4	24809
451.625	23897.6	369.07	346.69	27374.5	26288.2
452.065	24936.8	432.27	332.65	28844.3	27781.4
452.505	26364.5	458.01	334.99	30075.5	29384.7
452.946	27899.9	333.97	346.69	31760.6	30636.9
453.386	29168.5	366.73	309.24	33406	32312.7
453.826	30462.8	436.95	377.12	34290.8	33534.5
454.266	31843.7	392.48	407.55	35985.3	35334.3
454.707	33624.9	387.8	309.24	38014.5	36874.4
455.147	34930.9	362.05	358.39	39381.4	38793.7
455.587	36786.9	490.78	367.76	40837.2	39701.8
456.027	37723.2	366.73	386.48	41766.4	41169.3
456.467	39527.7	397.16	360.74	43348.6	43191.5
456.906	40775.2	333.97	316.26	44511.9	44176.9
457.346	42621.9	385.46	367.76	45073.6	46007.2
457.786	43501.9	422.91	330.31	45792.1	46217.8
458.226	45233.9	397.16	386.48	46576.2	48506.9
458.666	46057.8	385.46	384.14	47498.4	49007.8
459.105	48005.1	333.97	370.1	47886.9	50505.7
459.545	48915.6	434.61	363.08	47947.8	51191.5
459.984	49514.8	369.07	381.8	48284.8	51718.1
460.424	50591.4	413.54	367.76	47898.6	52834.5
460.863	50909.7	406.52	320.95	47709	52836.9
461.303	52000.4	432.27	356.05	48165.4	53450.1
461.742	52225.1	441.63	346.69	47746.5	53775.4
462.181	52098.7	404.18	365.42	46641.8	53625.6
462.621	52721.3	369.07	395.84	46613.7	54058.6
463.06	53400.1	408.86	419.25	46433.4	54194.4
463.499	53290.1	392.48	316.26	45581.5	54281
463.938	53229.2	420.57	363.08	44916.8	53541.4
464.377	52360.9	467.38	349.03	44238	53246.5
464.816	52419.4	380.78	330.31	44046.1	52904.7
465.255	51902.1	432.27	398.18	43358	53028.8
465.694	51427	429.93	356.05	42758.8	52506.8
466.133	50825.5	462.69	342.01	42646.5	52628.6
466.572	50142	425.25	325.63	42129.2	51713.4
467.01	49732.4	446.31	292.86	41963	51350.6
467.449	48377.3	542.27	379.46	41469.2	50681.2
467.888	47663.4	472.06	353.71	41483.2	50079.7
468.326	46565.7	521.21	327.97	41356.8	49461.8
468.765	45236.3	516.53	370.1	40685.1	48427.3
469.203	44466.2	511.85	325.63	40575.1	48031.7
469.642	43202.3	561	379.46	40448.7	47018.3
470.08	41882.3	525.89	435.63	40806.8	46608.7
470.519	41135.7	549.29	344.35	40809.1	46398.1
470.957	40091.8	617.17	332.65	40891.1	45178.6
471.395	38781.1	577.38	374.78	41331.1	44724.6
471.834	38420.6	589.08	346.69	41366.2	43776.7
472.272	37372.1	607.81	402.86	40792.8	43643.2
472.71	36337.6	656.96	332.65	41326.4	43102.6
473.148	35595.6	640.58	323.29	41298.3	42650.8
473.586	34444.1	713.13	353.71	41129.8	41637.4
474.024	33608.5	729.52	372.44	40902.8	41085
474.462	33196.6	804.41	363.08	40785.7	40797.2
474.9	32126.9	743.56	299.88	40724.9	39830.5
475.338	30980.1	792.71	290.52	40102.3	39336.7
475.775	30643	855.9	370.1	40284.9	38798.3
476.213	29760.6	879.31	337.33	40067.2	37815.3
476.651	29610.8	972.93	356.05	39943.1	37824.7
477.088	29007	1022.08	349.03	39425.9	37492.3
477.526	27787.6	1026.76	386.48	39119.3	36757.4
477.964	27216.5	1101.66	356.05	39294.8	36385.2
478.401	26516.7	1024.42	386.48	38559.9	35767.3
478.838	25767.7	1174.22	358.39	38398.4	35032.4
479.276	25049.1	1132.09	288.18	38108.2	34524.5
479.713	24543.6	1251.46	330.31	37509	34007.2
480.15	24169.1	1242.09	367.76	37040.9	33564.9
480.588	23246.9	1373.16	302.22	36359.8	32581.9
481.025	22956.7	1480.83	353.71	36235.7	32111.4
481.462	22224.1	1525.3	388.82	35819.1	31772
481.899	21236.4	1625.94	353.71	35341.7	31294.6
482.336	20726.2	1724.24	391.16	35519.5	30833.5
482.773	20110.6	1705.52	391.16	35194.2	30463.7
483.21	19305.5	1848.29	379.46	35468	29663.2
483.647	18886.5	1932.55	356.05	34552.9	29595.3
484.084	18303.7	2061.28	393.5	34239.3	28841.7
484.521	17566.5	2058.94	285.84	34459.3	28663.8
484.957	16936.8	2311.72	351.37	34396.1	27996.8
485.394	16618.5	2566.84	365.42	34021.6	27657.4
485.831	15855.5	2585.56	349.03	34566.9	27692.5
486.267	15364	2695.57	358.39	34101.2	26945.9
486.704	14554.2	2854.72	379.46	34262.7	26590.1
487.14	14118.8	2985.79	384.14	34852.5	26641.6
487.577	13360.5	3126.22	386.48	34604.4	26260.1
488.013	13067.9	3266.66	367.76	34536.5	25993.3
488.45	12475.8	3589.65	414.57	34456.9	25721.8
488.886	12173.9	3706.68	342.01	34258	25487.7
489.322	11815.8	3851.79	405.21	34609.1	25536.8
489.758	11216.6	4235.64	339.67	34887.6	25412.8
490.195	10807	4399.48	344.35	34637.2	25429.2
490.631	10488.7	4523.52	334.99	34428.8	25101.5
491.067	10041.6	4914.39	323.29	34826.7	25335.6
491.503	9704.59	5099.3	400.52	35109.9	24979.8
491.939	9475.22	5511.23	339.67	34667.6	25026.6
492.375	9053.92	5967.63	346.69	35217.6	25024.3
492.81	8796.46	6079.98	402.86	34976.5	24907.2
493.246	8588.16	6646.39	351.37	34604.4	25342.6
493.682	8068.56	6990.45	426.27	35374.4	25305.1
494.118	7935.15	7453.87	405.21	35404.8	25244.3
494.553	7775.99	7790.91	344.35	35381.4	25483
494.989	7497.47	8123.27	377.12	35966.6	25756.9
495.424	7321.93	8617.12	332.65	35706.8	26091.6
495.86	6991.91	9302.9	360.74	35819.1	25763.9
496.295	6931.06	9562.7	316.26	36373.8	25958.2
496.731	6640.83	10358.5	327.97	35847.2	26681.4
497.166	6430.18	10819.6	274.14	36411.3	26966.9
497.602	6362.31	11474.9	332.65	36392.6	27055.9
498.037	6182.09	11938.3	365.42	36678.1	27556.7
498.472	5912.92	12879.2	416.91	36984.7	27816.5
498.907	5917.61	13492.5	339.67	36729.6	28081
499.342	5601.63	14349.1	349.03	37274.9	28429.8
499.777	5559.5	14967	346.69	37392	29040.6
500.212	5369.92	15737	419.25	37698.6	29408.1
500.647	5067.99	16862.8	370.1	37579.2	29939.4
501.082	5056.29	17740.5	395.84	37944.3	30658
501.517	4901.81	18295.2	325.63	38431.2	30751.6
501.952	4702.87	19119.1	353.71	38667.6	31732.2
502.387	4660.74	20385.3	379.46	38850.1	32148.9
502.821	4471.15	21316.9	332.65	38803.3	32977.4
503.256	4316.68	22519.9	400.52	38831.4	33560.2
503.69	4295.61	23797.8	299.88	39332.3	34515.2
504.125	4148.16	24486	393.5	39428.2	34543.2
504.56	4061.56	25770.9	351.37	39936.1	35832.9
504.994	3794.74	26718.8	313.92	39828.5	36570.1
505.428	3731.55	28275.3	327.97	39627.2	36977.4
505.863	3869.64	29316.8	391.16	40659.3	37908.9
506.297	3619.2	30948.2	391.16	40570.4	38737.5
506.731	3687.08	31856.3	407.55	40422.9	39594.1
507.165	3492.81	33145.9	365.42	40795.1	40050.5
507.6	3462.38	34414.5	367.76	41429.4	40839.3
508.034	3450.68	35676.1	360.74	41288.9	41866.8
508.468	3317.27	36626.3	332.65	41497.3	42739.8
508.902	3340.68	37712.3	393.5	41583.9	43874.9
509.336	3244.71	39449	419.25	42091.8	44127.7
509.77	3073.85	40251.8	363.08	42204.1	45265.2
510.203	3022.36	41700.6	342.01	42176	45499.3
510.637	3118.32	42934.1	421.59	42620.7	46697.6
511.071	2994.28	43659.6	386.48	42824.3	47608.1
511.505	2919.38	44776.1	337.33	42894.6	47757.9
511.938	2828.1	45398.6	379.46	43030.3	48476.4
512.372	2797.67	46945.7	365.42	43189.5	49370.5
512.805	2842.14	47184.5	349.03	43608.4	50269.3
513.239	2741.5	48600.5	353.71	43533.5	50611
513.672	2699.37	49302.7	400.52	43933.8	51289.8
514.106	2687.67	49838.6	374.78	44109.3	51411.5
514.539	2624.47	50374.6	297.54	44156.1	52279.8
514.972	2558.94	50976.1	386.48	44514.2	52677.7
515.406	2643.2	51196.2	393.5	44818.5	52511.5
515.839	2622.13	51500.4	374.78	44565.7	53113.1
516.272	2458.29	51989.6	353.71	44942.5	53365.8
516.705	2495.74	51853.8	370.1	45003.4	53471.2
517.138	2486.38	52352.4	316.26	44762.3	53824.6
517.571	2458.29	52247.1	358.39	45209.3	53864.4
518.004	2402.12	52502.2	334.99	45317	54173.3
518.437	2488.72	51935.8	318.61	45518.3	53887.8
518.87	2413.82	51919.4	402.86	45375.5	53740.3
519.302	2404.46	51865.5	290.52	45780.4	53873.7
519.735	2273.39	51170.4	325.63	45848.3	53955.6
520.168	2296.8	50667.2	342.01	46145.6	53712.2
520.6	2259.35	50870.8	306.9	46349.2	53808.2
521.033	2217.22	49564.8	363.08	45838.9	53312
521.466	2142.32	49595.2	344.35	46035.6	52808.8
521.898	2254.67	48867.3	384.14	46037.9	52670.7
522.33	2121.26	47896	309.24	46653.5	52417.9
522.763	2116.58	47434.9	374.78	46396	51769.6
523.195	2203.18	45976.8	398.18	46576.2	51601.1
523.627	2128.28	45810.6	412.23	46669.8	50730.4
524.06	2175.09	44846.3	358.39	46257.9	50793.6
524.492	2095.51	44034.1	428.61	46833.7	49660.8
524.924	2037	42950.4	367.76	46578.6	49770.8
525.356	2102.53	42297.4	370.1	46690.9	49157.5
525.788	2116.58	40991.4	353.71	47229.2	48151.1
526.22	2116.58	40308	363.08	47266.7	48394.5
526.652	2006.57	39261.8	379.46	46974.1	47369.4
527.084	2048.7	38208.5	409.89	46660.5	46725.7
527.516	1964.44	37841.1	337.33	47858.8	46377
527.947	2018.27	36560.8	351.37	47229.2	46131.2
528.379	2018.27	35648	337.33	47262	45209.1
528.811	1990.19	34917.7	360.74	46950.7	44738.6
529.242	2029.98	33951.1	416.91	47594.3	44296.2
529.674	1894.22	32832.3	409.89	47468	43690.1
530.105	1884.86	32177	379.46	47393.1	43371.7
530.537	1852.1	31392.9	414.57	47273.7	42597
530.968	1997.21	30934.1	374.78	47875.2	42365.3
531.399	1978.48	30255.4	351.37	47781.6	41700.6
531.831	1915.29	29092.1	370.1	47723.1	41616.3
532.262	1938.69	28717.6	304.56	47802.7	40666.1
532.693	1950.4	28235.5	344.35	48392.5	40565.4
533.124	1994.87	27201	367.76	47809.7	40116.1
533.555	1868.48	26711.8	374.78	48319.9	39680.7
533.986	1931.67	25878.6	402.86	47699.7	39222
534.417	1948.06	25569.6	327.97	47968.8	38545.6
534.848	1910.61	24195.7	360.74	47912.7	38538.5
535.279	1891.88	24132.5	349.03	47996.9	38028.3
535.71	1931.67	23353.1	344.35	48326.9	37520.4
536.141	2069.76	23039.5	414.57	47879.9	37108.5
536.572	1873.16	22496.5	302.22	48357.4	37049.9
537.002	1938.69	22096.3	379.46	48769.3	36261.2
537.433	1807.62	21403.5	330.31	48493.1	36188.6
537.863	1859.12	20654.5	304.56	48614.8	36041.2
538.294	1943.38	20127.9	363.08	48687.4	35732.2
538.724	1868.48	19697.2	386.48	48359.7	35020.7
539.155	1882.52	19219.8	416.91	48940.2	34489.4
539.585	1882.52	18789.1	339.67	48465	34777.3
540.015	1945.72	18077.6	351.37	48867.6	33958.1
540.446	1898.91	17895	323.29	48972.9	34033
540.876	1842.73	17497.1	386.48	48804.4	33686.6
541.306	1896.57	16701.3	295.2	49174.2	33145.9
541.736	1728.05	16467.3	391.16	49012.7	33031.2
542.166	1824.01	15774.5	365.42	49246.8	32696.5
542.596	1809.97	15584.9	388.82	48877	32434.4
543.026	1875.5	14931.9	400.52	49485.5	32228.5
543.456	1824.01	14571.4	313.92	49155.5	31861
543.886	1795.92	14182.9	337.33	49867	31825.9
544.316	1856.78	13902	400.52	49956	30920.1
544.745	1793.58	13511.2	384.14	49977	31233.7
545.175	1840.39	12928.4	435.63	49228.1	30906
545.605	1758.47	12706	342.01	49665.7	30964.6
546.034	1814.65	12282.4	423.93	50012.1	30878
546.464	1896.57	11552.1	384.14	49963	30409.8
546.893	1777.2	11547.5	302.22	50302.3	30150
547.323	1866.14	10910.9	332.65	49731.3	29794.3
547.752	1763.15	10676.8	365.42	49733.6	29923
548.181	1800.6	10292.9	377.12	50403	29204.5
548.611	1809.97	10105.7	367.76	50075.3	28900.2
549.04	1809.97	9920.8	363.08	50225.1	29188.1
549.469	1877.84	9574.4	416.91	50449.8	28949.3
549.898	1845.07	9129.7	386.48	50096.4	28614.7
550.327	1873.16	8900.33	320.95	50510.7	28705.9
550.756	1802.94	8591.38	292.86	50618.3	28441.5
551.185	1840.39	8315.19	384.14	50506	28036.5
551.614	1824.01	8067.1	384.14	50534.1	28198
552.043	1826.35	7872.83	414.57	50524.7	28186.3
552.472	1760.81	7598.99	349.03	51116.9	27739.3
552.9	1786.56	7229.18	381.8	50585.6	27767.4
553.329	1716.34	7095.77	419.25	50824.3	27212.7
553.758	1805.28	6943.64	377.12	50641.7	27210.3
554.186	1784.22	6730.65	363.08	50660.5	27044.2
554.615	1840.39	6400.63	325.63	50885.2	26690.7
555.043	1838.05	6360.84	356.05	50625.3	26910.8
555.472	1728.05	6267.22	318.61	50786.8	26688.4
555.9	1908.27	5923.16	316.26	50807.9	26744.6
556.328	1767.84	5785.07	388.82	50850	26744.6
556.757	1744.43	5618.89	388.82	51065.4	26278.8
557.185	1770.18	5459.74	349.03	51519.4	26220.3
557.613	1828.69	5370.8	339.67	51699.7	26229.7
558.041	1805.28	5221	379.46	51718.4	26271.8
558.469	1721.03	5068.87	416.91	51603.7	26253.1
558.897	1798.26	4947.16	370.1	51336.9	26213.3
559.325	1868.48	4783.32	367.76	51400.1	26000.3
559.753	1671.87	4762.26	381.8	51603.7	25850.5
560.181	1824.01	4621.83	426.27	52039	26189.9
560.609	1912.95	4453.31	346.69	52242.7	25909
561.037	1873.16	4415.86	402.86	52427.6	26405.2
561.464	1866.14	4259.04	349.03	52179.5	26344.3
561.892	1856.78	4177.12	402.86	52757.6	26119.7
562.319	1824.01	4046.05	342.01	53317	26210.9
562.747	1887.2	3994.56	381.8	53340.4	25958.2
563.175	1873.16	3975.84	367.76	53108.7	26505.8
563.602	1877.84	3730.08	377.12	53640	26335
564.029	1798.26	3800.3	320.95	54140.8	26269.4
564.457	1791.24	3636.46	374.78	53815.5	26482.4
564.884	1945.72	3577.95	370.1	54300	26557.3
565.311	1980.82	3470.28	395.84	54288.3	26681.4
565.738	1875.5	3409.43	409.89	54800.9	26892
566.165	1910.61	3360.28	456.7	54831.3	26737.5
566.592	1957.42	3287.72	447.33	55137.9	26576
567.019	1931.67	3182.4	426.27	55070	26903.7
567.446	2044.02	3128.56	395.84	55173	26779.7
567.873	1835.71	2967.07	444.99	55109.8	26936.5
568.3	1924.65	2821.95	482.44	55247.9	26756.3
568.727	1905.93	2901.53	454.36	54866.4	26950.5
569.154	1849.75	2775.14	412.23	55269	26435.6
569.58	1873.16	2803.23	442.65	55259.6	26683.7
570.007	1788.9	2573.86	459.04	55100.4	26512.9
570.434	1884.86	2608.97	435.63	55175.3	26400.5
570.86	1819.33	2433.43	473.08	55222.2	26009.6
571.287	1870.82	2398.32	442.65	55147.3	25981.6
571.713	1948.06	2426.4	475.42	55100.4	26489.5
572.139	1863.8	2199.37	419.25	54548.1	25904.3
572.566	1896.57	2229.8	505.85	54936.6	25712.4
572.992	1887.2	2246.18	444.99	54571.5	25960.5
573.418	1819.33	2190.01	503.51	54328.1	25445.6
573.844	1840.39	2091.71	440.31	54262.5	25625.8
574.27	1793.58	2124.48	473.08	54459.2	25632.8
574.696	1931.67	2115.11	489.46	54424	25611.8
575.122	1852.1	1974.68	444.99	54555.1	25309.8
575.548	1835.71	1876.38	468.4	54555.1	25651.5
575.974	1866.14	1902.12	456.7	54166.6	25417.5
576.4	1861.46	1820.21	571.38	54349.1	25253.7
576.826	1784.22	1792.12	550.32	53934.9	24979.8
577.252	1955.08	1717.22	524.57	53771	24736.4
577.677	1845.07	1668.07	498.83	54033.2	25370.7
578.103	1863.8	1670.41	604.15	53731.2	24729.4
578.528	1875.5	1630.62	531.59	54183	24914.3
578.954	1847.41	1616.58	576.06	53675.1	25131.9
579.379	1800.6	1644.67	643.94	53995.7	25183.4
579.805	1770.18	1558.07	578.4	53967.6	24706
580.23	1896.57	1499.55	594.79	53696.1	25068.8
580.655	1788.9	1464.44	655.64	53771	24935.3
581.081	1915.29	1499.55	618.19	54051.9	24886.2
581.506	1915.29	1504.23	618.19	53902.1	25085.1
581.931	1812.31	1522.96	674.37	54178.3	25136.6
582.356	1800.6	1398.91	655.64	54356.2	25036
582.781	1821.67	1354.44	620.53	53794.4	24853.4
583.206	1786.56	1422.31	751.6	53742.9	24593.6
583.631	1824.01	1335.71	751.6	53967.6	24919
584.056	1842.73	1335.71	700.11	53436.3	24500
584.481	1831.03	1377.84	709.47	53492.5	24902.6
584.905	1791.24	1274.86	887.36	53904.4	24797.2
585.33	1814.65	1230.39	831.18	53850.6	24762.1
585.755	1870.82	1274.86	821.82	53827.2	24347.9
586.179	1847.41	1288.9	885.02	53623.6	24757.5
586.604	1819.33	1253.8	866.29	53689.1	24804.3
587.028	1845.07	1216.35	945.87	53684.4	24755.1
587.453	1856.78	1176.56	824.16	53361.4	24706
587.877	1838.05	1197.62	1034.81	53331	24591.3
588.302	1774.86	1153.15	1006.72	53656.3	24745.8
588.726	1849.75	1174.22	1076.94	53403.6	24867.5
589.15	1793.58	1132.09	1079.28	53742.9	24663.8
589.574	1751.45	1022.08	1144.81	53328.7	24570.2
589.998	1793.58	1221.03	1119.07	53359.1	24624
590.422	1753.79	1197.62	1156.52	53349.7	24813.6
590.846	1833.37	1078.26	1186.94	53349.7	24654.5
591.27	1847.41	1089.96	1257.16	53017.4	24605.3
591.694	1863.8	1132.09	1303.97	53045.5	24666.2
592.118	1824.01	1017.4	1442.06	52942.5	24251.9
592.542	1746.77	1057.19	1432.7	52745.9	24572.5
592.966	1791.24	1071.23	1423.34	52970.6	24596
593.389	1821.67	1092.3	1552.07	52617.1	24640.4
593.813	1774.86	1071.23	1589.52	52837.2	24535.1
594.236	1875.5	984.63	1673.78	52238	24273
594.66	1870.82	1033.79	1715.91	52701.4	24787.9
595.083	1737.41	1036.13	1743.99	52771.6	24500
595.507	1655.49	1022.08	1779.1	52563.3	24298.7
595.93	1781.88	1050.17	1863.36	52233.3	24324.5
596.354	1798.26	958.89	1914.85	52551.6	24212.1
596.777	1814.65	979.95	2029.54	52516.5	24670.9
597.2	1721.03	1017.4	2090.39	51929	24523.4
597.623	1819.33	1033.79	2319.76	52198.2	24919
598.046	1779.54	968.25	2305.72	51687.9	24598.3
598.469	1770.18	951.87	2495.3	51982.9	24841.7
598.892	1744.43	933.14	2617.01	52441.6	24593.6
599.315	1824.01	933.14	2619.35	51765.2	24628.7
599.738	1704.64	979.95	2729.36	51570.9	25124.9
600.161	1676.55	876.97	2872.13	51896.3	25068.8
600.584	1723.37	942.5	3000.86	51341.6	25040.7
601.006	1774.86	989.32	3047.67	51847.1	24823
601.429	1795.92	975.27	3384.71	52212.2	25349.6
601.851	1714	1096.98	3464.29	51917.3	25344.9
602.274	1765.5	919.1	3670.25	52207.6	25504.1
602.696	1840.39	942.5	3787.28	52668.6	25775.6
603.119	1805.28	937.82	4002.61	52776.3	26107.9
603.541	1758.47	982.29	4114.95	52710.8	26140.7
603.964	1802.94	958.89	4341.99	52376.1	26241.4
604.386	1767.84	996.34	4473.06	52741.2	26662.7
604.808	1791.24	989.32	4835.84	52818.4	26517.5
605.23	1791.24	926.12	5158.83	52872.3	26730.5
605.652	1809.97	912.08	5322.67	53176.5	27144.8
606.074	1852.1	947.19	5622.26	52994	27261.8
606.496	1828.69	994	5814.18	52755.2	27814.2
606.918	1849.75	905.06	6375.91	53113.3	27629.3
607.34	1807.62	930.8	6570.18	53260.8	27992.1
607.762	1854.44	914.42	6979.77	52958.9	28017.8
608.184	1777.2	883.99	7330.85	52928.4	28076.3
608.606	1714	958.89	7506.39	53164.8	28689.6
609.027	1842.73	979.95	8082.16	53050.1	28595.9
609.449	1793.58	895.69	8669.64	52664	29171.7
609.87	1863.8	1008.04	8688.36	52209.9	28729.3
610.292	1735.07	923.78	9383.5	52436.9	28951.7
610.713	1704.64	919.1	9849.27	52116.3	29000.8
611.135	1833.37	862.93	10184	51388.4	29380
611.556	1692.94	881.65	10605.3	51247.9	29359
611.977	1728.05	844.2	11368.3	51128.6	29829.4
612.398	1770.18	914.42	11962.8	50716.6	29660.9
612.82	1662.51	883.99	12618.1	50370.2	29469
613.241	1674.21	865.27	13163.5	50037.9	29916
613.662	1842.73	898.03	13509.9	49097	30004.9
614.083	1697.62	832.5	14448.4	48879.3	30070.5
614.504	1695.28	862.93	14881.4	48303.5	30749.2
614.925	1604	745.9	15841	48317.6	30381.8
615.345	1575.91	834.84	16545.5	47229.2	30690.7
615.766	1599.32	809.09	17556.7	46950.7	31095.6
616.187	1554.85	902.72	18141.8	46676.9	31971
616.608	1667.19	757.6	19202	46145.6	31378.8
617.028	1540.8	862.93	19480.6	45998.1	31662
617.449	1559.53	883.99	20449.5	45361.5	32050.6
617.869	1580.59	802.07	21198.5	44809.1	32441.4
618.29	1592.3	764.62	22006	44635.9	32312.7
618.71	1484.63	846.54	22883.7	43554.6	32801.9
619.131	1505.7	771.65	23953.3	43631.8	33426.8
619.551	1416.76	839.52	25018.3	42831.4	33597.7
619.971	1472.93	797.39	26048.1	42793.9	33918.3
620.391	1395.69	862.93	26780.7	42262.6	34079.8
620.811	1482.29	741.22	27644.4	41759.4	34332.6
621.231	1444.84	773.99	28770.2	41267.9	34969.2
621.651	1498.67	741.22	30017.7	40994	35095.6
622.071	1484.63	738.88	30963.2	40488.5	36071.6
622.491	1493.99	776.33	32046.9	39760.6	36109.1
622.911	1395.69	785.69	33044	39821.4	37003.1
623.331	1358.24	759.94	33851.5	38999.9	37213.8
623.751	1405.05	860.59	35536.7	39074.8	37445.5
624.17	1369.94	776.33	36412	38185.4	38192.1
624.59	1412.07	752.92	37704	38396.1	38585.3
625.009	1330.16	766.96	38820.4	37373.2	39037.1
625.429	1391.01	678.02	40299.6	37562.8	39718.2
625.848	1400.37	762.28	41718	37366.2	39846.9
626.268	1353.56	757.6	42474	36303.6	41372.9
626.687	1360.58	820.8	43681.7	36296.6	41307.4
627.106	1386.33	701.43	44807.5	36032.1	42515.1
627.526	1360.58	741.22	45369.2	35734.9	42430.8
627.945	1290.37	792.71	46392.1	35037.4	43210.2
628.364	1243.56	668.66	46469.3	34623.1	43224.3
628.783	1241.22	783.35	47002.9	34529.5	43921.8
629.202	1236.53	776.33	46953.8	34262.7	43907.7
629.621	1311.43	710.79	47028.7	33967.8	44263.5
630.04	1206.11	656.96	46527.8	33403.7	44041.1
630.459	1187.38	731.86	45771.8	32940.3	44296.2
630.878	1243.56	745.9	45289.7	32739	44200.3
631.296	1255.26	668.66	43934.5	32923.9	43903
631.715	1189.72	692.07	42684.6	32078.9	43097.9
632.134	1224.83	706.11	40926.9	31669.3	42311.5
632.552	1238.87	668.66	38495.1	30946.1	41115.5
632.971	1135.89	652.28	36648.4	30915.7	40237.8
633.389	1203.77	689.73	34551.3	30761.2	39158.8
633.807	1208.45	729.52	32297.3	30595	37965.1
634.226	1187.38	745.9	30099.6	30138.6	36228.4
634.644	1180.36	647.6	27576.5	29621.4	34805.4
635.062	1156.96	689.73	25530.9	29289	33684.3
635.48	1182.7	699.09	23237.1	28977.7	31636.3
635.899	1058.65	687.39	21364.7	28926.2	30407.5
636.317	1117.17	703.77	19241.8	28282.6	28691.9
636.735	1039.93	640.58	17652.6	28088.3	27175.2
637.153	1145.25	699.09	16222.5	28011.1	25670.3
637.57	1058.65	675.68	14621.6	27365.1	24308.1
637.988	1180.36	591.42	13432.6	27344	23620
638.406	1096.1	598.45	12239	27072.5	21871.6
638.824	1058.65	628.87	11267.6	26620.8	21108.6
639.241	1100.78	703.77	10298.6	26332.9	20287
639.659	1030.57	621.85	9371.8	25939.7	19540.4
640.077	1077.38	663.98	8693.04	25696.3	18447.4
640.494	1021.2	607.81	7885.56	25261	17768.6
640.912	1058.65	546.95	7405.75	25085.4	17185.8
641.329	1103.12	546.95	6883.81	24615	16345.6
641.746	997.8	661.64	6350.17	24235.8	15779.2
642.164	997.8	645.26	5893.76	24259.2	15318.1
642.581	1025.89	603.13	5217.35	24093	14665.1
642.998	988.44	582.06	4861.59	23255.1	14428.7
643.415	1070.36	624.19	4716.47	23213	13930.1
643.832	995.46	619.51	4140.7	23201.3	13459.7
644.249	976.73	523.55	3862.18	22787	13167.1
644.666	958.01	558.66	3691.32	22454.7	12556.2
645.083	915.88	598.45	3284.06	22405.5	12273
645.5	965.03	694.41	2921.28	22010	11964.1
645.916	988.44	575.04	2862.77	21921	11957.1
646.333	988.44	565.68	2635.74	21572.3	11456.2
646.75	988.44	614.83	2404.02	21303.1	11070
647.166	962.69	579.72	2247.21	21083.1	10962.3
647.583	913.54	645.26	2066.99	20523.7	10658.1
647.999	887.79	652.28	1928.89	20568.2	10255.5
648.416	873.75	577.38	1765.06	20104.8	10351.5
648.832	878.43	544.61	1657.39	20020.5	9817.82
649.249	897.16	518.87	1528.66	19667.1	9721.85
649.665	864.39	565.68	1413.98	19463.5	9686.75
650.081	850.35	605.47	1313.33	19339.4	9288.85
650.497	843.32	544.61	1381.21	18948.5	8951.82
650.913	883.11	589.08	1247.8	18751.9	8792.66
651.329	873.75	582.06	1177.58	18436	8923.73
651.745	876.09	596.11	1107.37	18117.7	8614.78
652.161	878.43	544.61	1079.28	17902.3	8481.37
652.577	946.31	551.64	1030.13	17874.2	8467.33
652.993	899.5	589.08	901.4	17518.5	8186.46
653.409	843.32	556.32	997.36	16921.6	8350.3
653.824	784.81	586.74	915.44	16884.2	8083.48
654.24	808.22	603.13	821.82	16874.8	7882.19
654.655	838.64	546.95	831.18	16584.6	7622.39
655.071	871.41	556.32	784.37	16163.3	7467.92
655.486	763.75	488.44	730.54	16163.3	7339.19
655.902	808.22	535.25	763.31	15812.2	7435.15
656.317	885.45	535.25	707.13	15802.9	7278.33
656.732	728.64	497.8	665	15470.5	7109.82
657.148	791.83	539.93	697.77	15016.4	6887.47
657.563	798.85	579.72	681.39	15025.8	6721.29
657.978	745.02	518.87	716.5	14925.2	6810.23
658.393	775.45	490.78	599.47	14550.7	6709.58
658.808	756.72	500.14	559.68	14136.4	6709.58
659.223	700.55	535.25	636.92	14246.4	6405.31
659.638	730.98	551.64	622.88	14017	6328.08
660.053	719.28	497.8	580.75	13691.7	6283.61
660.467	705.23	535.25	578.4	13733.8	6082.32
660.882	714.59	479.08	482.44	13319.5	5988.7
661.297	705.23	490.78	508.19	13207.2	5874.01
661.711	670.12	537.59	576.06	13279.8	5841.25
662.126	714.59	429.93	508.19	12811.6	5766.35
662.54	712.25	542.27	463.72	12266.3	5689.11
662.955	721.62	486.1	501.17	12116.5	5735.92
663.369	623.31	450.99	512.87	12060.3	5544
663.784	630.34	474.4	449.68	11903.5	5433.99
664.198	609.27	481.42	489.46	11678.8	5302.92
664.612	684.17	486.1	510.53	11547.8	5277.18
665.026	721.62	504.82	421.59	11309	5127.38
665.44	630.34	467.38	459.04	11018.8	4928.44
665.854	679.49	474.4	377.12	10995.4	4907.37
666.268	627.99	488.44	405.21	10714.5	4926.1
666.682	627.99	472.06	402.86	10592.8	4907.37
667.096	613.95	420.57	409.89	10478.1	4706.09
667.51	679.49	443.97	372.44	10192.6	4659.28
667.924	658.42	488.44	339.67	10152.8	4633.53
668.337	679.49	383.12	344.35	9932.79	4567.99
668.751	674.81	469.72	419.25	9665.97	4380.75
669.164	616.29	448.65	454.36	9605.12	4336.28
669.578	639.7	418.22	388.82	9364.04	4355.01
669.991	679.49	537.59	423.93	9249.36	4287.13
670.405	602.25	504.82	440.31	8928.7	4118.61
670.818	581.18	458.01	384.14	9090.2	4053.08
671.231	578.84	453.33	398.18	8816.36	4062.44
671.645	529.69	432.27	426.27	8565.92	4104.57
672.058	555.44	450.99	377.12	8615.07	4024.99
672.471	571.82	472.06	372.44	8381.02	3917.33
672.884	604.59	514.19	400.52	8006.53	3842.43
673.297	588.21	488.44	407.55	8146.97	3711.36
673.71	555.44	528.23	412.23	8034.62	3671.57
674.123	585.87	429.93	349.03	7976.11	3617.74
674.536	595.23	394.82	356.05	7826.31	3582.63
674.948	620.97	420.57	360.74	7671.84	3540.5
675.361	588.21	443.97	346.69	7451.83	3428.15
675.774	548.42	432.27	386.48	7695.24	3556.88
676.186	503.95	439.29	372.44	7313.74	3362.62
676.599	517.99	429.93	447.33	7168.62	3390.7
677.011	585.87	448.65	384.14	7147.56	3177.72
677.424	522.67	474.4	311.58	7018.83	3163.67
677.836	583.52	383.12	386.48	6812.86	3276.02
678.248	564.8	490.78	398.18	6749.67	3177.72
678.661	553.1	448.65	393.5	6775.41	3112.18
679.073	508.63	458.01	381.8	6721.58	3030.26
679.485	536.71	465.04	353.71	6405.61	2981.11
679.897	576.5	458.01	400.52	6429.01	2999.84
680.309	501.61	362.05	388.82	6152.83	2955.37
680.721	515.65	481.42	381.8	6115.38	2941.32
681.133	548.42	434.61	393.5	6120.06	2833.66
681.545	440.75	455.67	346.69	6216.02	2885.15
681.957	485.22	397.16	421.59	6017.08	2852.38
682.368	574.16	427.59	407.55	5958.57	2782.17
682.78	539.05	446.31	407.55	5733.87	2761.1
683.192	429.05	418.22	381.8	5811.11	2646.41
683.603	539.05	362.05	325.63	5577.06	2775.14
684.015	522.67	394.82	334.99	5506.84	2749.4
684.426	501.61	348.01	356.05	5453.01	2564.5
684.837	503.95	427.59	412.23	5396.84	2545.77
685.249	480.54	380.78	365.42	5375.77	2468.53
685.66	461.82	469.72	360.74	5244.7	2505.98
686.071	541.4	425.25	365.42	5233	2510.66
686.482	503.95	458.01	334.99	5092.57	2381.93
686.893	494.58	436.95	344.35	5115.97	2344.49
687.304	496.92	441.63	409.89	4886.6	2421.72
687.715	515.65	411.2	384.14	4881.92	2342.14
688.126	569.48	427.59	344.35	4823.41	2218.1
688.537	494.58	434.61	327.97	4743.83	2346.83
688.948	517.99	380.78	379.46	4797.66	2243.84
689.359	478.2	476.74	374.78	4453.6	2262.57
689.769	492.24	434.61	311.58	4526.16	2199.37
690.18	438.41	441.63	398.18	4591.69	2157.24
690.591	443.09	465.04	334.99	4481.69	2173.63
691.001	431.39	380.78	407.55	4231.25	2098.73
691.411	375.22	425.25	353.71	4191.46	2145.54
691.822	489.9	418.22	372.44	4249.97	2194.69
692.232	447.77	350.35	360.74	4086.14	2047.24
692.642	468.84	455.67	356.05	4303.81	2030.85
693.053	492.24	376.09	374.78	4168.06	2087.03
693.463	510.97	413.54	313.92	4069.75	1946.59
693.873	389.26	390.14	360.74	4135.29	2098.73
694.283	461.82	422.91	379.46	3889.53	1906.81
694.693	422.03	427.59	334.99	3821.66	1881.06
695.103	494.58	443.97	358.39	3847.4	1923.19
695.513	415.01	373.75	370.1	3760.8	1876.38
695.922	461.82	479.08	346.69	3812.29	1810.84
696.332	431.39	495.46	332.65	3739.74	1742.97
696.742	496.92	474.4	370.1	3641.43	1778.08
697.151	419.69	427.59	302.22	3522.07	1799.14
697.561	525.01	401.84	360.74	3522.07	1785.1
697.97	379.9	448.65	278.82	3440.15	1714.88
698.38	459.48	420.57	370.1	3360.57	1684.45
698.789	398.62	390.14	309.24	3330.14	1778.08
699.199	461.82	366.73	311.58	3243.54	1623.6
699.608	473.52	401.84	426.27	3299.72	1733.61
700.017	424.37	397.16	407.55	3257.59	1595.51
700.426	384.58	373.75	440.31	3320.78	1590.83
700.835	457.14	390.14	367.76	3175.67	1675.09
701.244	459.48	443.97	358.39	3126.52	1574.45
701.653	457.14	425.25	370.1	3000.13	1548.7
702.062	478.2	432.27	398.18	3124.18	1480.83
702.471	398.62	429.93	395.84	3142.9	1553.38
702.88	433.73	324.6	409.89	2925.23	1464.44
703.289	384.58	352.69	353.71	2876.08	1469.13
703.697	386.92	404.18	346.69	2939.27	1438.7
704.106	464.16	406.52	323.29	2885.44	1366.14
704.514	391.6	425.25	358.39	2787.14	1417.63
704.923	473.52	432.27	370.1	2794.16	1340.4
705.331	459.48	366.73	398.18	2630.32	1412.95
705.74	370.54	355.03	349.03	2679.47	1377.84
706.148	396.28	432.27	337.33	2606.92	1300.61
706.556	447.77	352.69	339.67	2604.58	1331.03
706.965	424.37	355.03	346.69	2461.8	1267.84
707.373	431.39	420.57	360.74	2581.17	1267.84
707.781	415.01	345.67	344.35	2536.7	1291.24
708.189	459.48	378.44	316.26	2513.3	1309.97
708.597	424.37	408.86	320.95	2443.08	1249.11
709.005	384.58	425.25	372.44	2464.15	1153.15
709.413	417.35	406.52	290.52	2431.38	1274.86
709.82	464.16	373.75	313.92	2342.44	1146.13
710.228	482.88	418.22	313.92	2382.23	1225.71
710.636	412.67	357.37	372.44	2272.22	1059.53
711.043	459.48	413.54	313.92	2321.37	1164.86
711.451	377.56	357.37	377.12	2239.45	1183.58
711.858	433.73	378.44	356.05	2288.61	1242.09
712.266	410.33	357.37	309.24	2227.75	1183.58
712.673	403.3	406.52	356.05	2070.94	1122.73
713.081	384.58	406.52	393.5	2005.4	1153.15
713.488	403.3	359.71	391.16	2134.13	1050.17
713.895	440.75	380.78	353.71	1984.34	1115.7
714.302	433.73	373.75	302.22	2010.08	1148.47
714.709	436.07	404.18	367.76	2031.15	1066.55
715.116	375.22	390.14	306.9	1932.84	1174.22
715.523	450.11	422.91	295.2	1953.91	1071.23
715.93	393.94	362.05	402.86	1907.1	1019.74
716.337	473.52	406.52	344.35	1897.74	1115.7
716.744	424.37	373.75	363.08	1813.48	1005.7
717.15	361.17	394.82	370.1	1797.09	975.27
717.557	342.45	345.67	360.74	1818.16	933.14
717.964	398.62	376.09	358.39	1776.03	977.61
718.37	405.64	371.41	370.1	1869.65	1005.7
718.777	459.48	392.48	379.46	1757.3	951.87
719.183	377.56	397.16	337.33	1733.9	893.35
719.589	358.83	392.48	388.82	1736.24	886.33
719.996	358.83	425.25	339.67	1691.77	905.06
720.402	422.03	404.18	332.65	1696.45	909.74
720.808	417.35	411.2	351.37	1673.04	881.65
721.214	412.67	371.41	372.44	1586.44	839.52
721.62	351.81	411.2	318.61	1549	872.29
722.026	370.54	362.05	349.03	1537.29	891.01
722.432	309.68	355.03	379.46	1530.27	935.48
722.838	429.05	406.52	351.37	1532.61	893.35
723.244	389.26	348.01	309.24	1581.76	872.29
723.65	415.01	364.39	306.9	1474.1	762.28
724.055	419.69	352.69	320.95	1450.69	860.59
724.461	389.26	415.88	323.29	1427.29	827.82
724.867	452.45	329.28	393.5	1471.76	839.52
725.272	349.47	434.61	358.39	1410.9	823.14
725.678	351.81	369.07	346.69	1446.01	830.16
726.083	452.45	310.56	344.35	1350.05	827.82
726.488	410.33	348.01	327.97	1357.07	788.03
726.894	375.22	340.99	316.26	1314.94	867.61
727.299	403.3	394.82	395.84	1303.24	766.96
727.704	386.92	352.69	480.1	1319.62	839.52
728.109	375.22	383.12	337.33	1300.9	745.9
728.514	429.05	420.57	349.03	1336.01	883.99
728.919	370.54	348.01	323.29	1258.77	783.35
729.324	379.9	439.29	391.16	1277.49	729.52
729.729	393.94	474.4	339.67	1233.02	778.67
730.134	351.81	434.61	400.52	1214.3	792.71
730.538	377.56	331.62	325.63	1209.62	708.45
730.943	447.77	448.65	351.37	1216.64	783.35
731.348	429.05	364.39	356.05	1211.96	738.88
731.752	426.71	413.54	353.71	1167.49	738.88
732.157	410.33	404.18	393.5	1204.94	689.73
732.561	379.9	362.05	346.69	1240.05	703.77
732.966	457.14	369.07	388.82	1069.19	731.86
733.37	391.6	383.12	288.18	1197.92	729.52
733.774	372.88	350.35	416.91	1200.26	678.02
734.178	452.45	378.44	358.39	1087.91	680.36
734.582	419.69	390.14	372.44	1090.25	696.75
734.987	363.51	324.6	351.37	1024.72	631.21
735.391	368.2	364.39	309.24	1153.45	696.75
735.795	396.28	371.41	360.74	1080.89	708.45
736.198	417.35	333.97	344.35	1052.8	703.77
736.602	396.28	385.46	309.24	987.27	647.6
737.006	354.15	422.91	379.46	1048.12	642.92
737.41	384.58	425.25	377.12	1048.12	675.68
737.813	422.03	413.54	351.37	1076.21	596.11
738.217	433.73	371.41	295.2	991.95	617.17
738.621	393.94	345.67	367.76	968.54	589.08
739.024	382.24	336.31	290.52	1055.14	624.19
739.427	365.85	357.37	302.22	1013.01	607.81
739.831	412.67	355.03	370.1	956.84	656.96
740.234	351.81	385.46	342.01	980.25	626.53
740.637	422.03	429.93	330.31	973.22	607.81
741.04	391.6	294.18	344.35	928.75	549.29
741.444	426.71	411.2	386.48	959.18	612.49
741.847	361.17	364.39	365.42	851.52	556.32
742.25	363.51	397.16	304.56	947.48	607.81
742.652	351.81	322.26	381.8	881.94	589.08
743.055	396.28	408.86	295.2	921.73	610.15
743.458	382.24	345.67	377.12	898.33	488.44
743.861	391.6	359.71	423.93	844.49	596.11
744.264	382.24	357.37	346.69	949.82	584.4
744.666	349.47	436.95	337.33	874.92	631.21
745.069	305	418.22	337.33	949.82	598.45
745.471	354.15	406.52	283.5	825.77	570.36
745.874	386.92	329.28	339.67	842.15	511.85
746.276	368.2	425.25	372.44	814.07	558.66
746.678	370.54	343.33	306.9	860.88	619.51
747.081	237.13	348.01	330.31	809.39	579.72
747.483	372.88	376.09	349.03	814.07	556.32
747.885	403.3	434.61	316.26	863.22	558.66
748.287	361.17	357.37	285.84	793	577.38
748.689	344.79	371.41	407.55	853.86	612.49
749.091	379.9	350.35	391.16	818.75	561
749.493	419.69	322.26	405.21	774.28	549.29
749.895	393.94	441.63	421.59	790.66	563.34
750.296	419.69	350.35	360.74	811.73	535.25
750.698	443.09	371.41	337.33	743.85	610.15
751.1	429.05	380.78	346.69	781.3	495.46
751.501	419.69	357.37	353.71	788.32	572.7
751.903	393.94	364.39	344.35	757.89	617.17
752.304	344.79	366.73	323.29	802.36	631.21
752.706	445.43	324.6	372.44	781.3	551.64
753.107	330.75	394.82	391.16	725.13	542.27
753.508	358.83	298.86	337.33	795.34	617.17
753.909	389.26	350.35	337.33	797.68	570.36
754.311	335.43	345.67	402.86	750.87	507.16
754.712	372.88	357.37	365.42	720.45	509.51
755.113	422.03	359.71	295.2	748.53	486.1
755.514	379.9	369.07	344.35	736.83	490.78
755.915	326.07	343.33	405.21	720.45	495.46
756.315	386.92	345.67	353.71	771.94	453.33
756.716	396.28	340.99	395.84	680.66	497.8
757.117	459.48	324.6	370.1	727.47	551.64
757.518	429.05	385.46	398.18	661.93	483.76
757.918	312.02	418.22	386.48	732.15	514.19
758.319	323.73	411.2	332.65	762.58	530.57
758.719	403.3	357.37	400.52	675.98	476.74
759.12	436.07	408.86	374.78	718.11	546.95
759.52	424.37	350.35	327.97	736.83	516.53
759.92	384.58	338.65	358.39	668.95	528.23
760.321	419.69	392.48	271.79	711.08	493.12
760.721	398.62	411.2	379.46	654.91	518.87
761.121	344.79	385.46	381.8	633.85	572.7
761.521	417.35	432.27	386.48	694.7	509.51
761.921	342.45	397.16	349.03	598.74	455.67
762.321	340.11	369.07	334.99	601.08	460.35
762.721	344.79	434.61	351.37	675.98	474.4
763.12	340.11	340.99	398.18	666.61	462.69
763.52	368.2	443.97	367.76	650.23	488.44
763.92	386.92	362.05	288.18	643.21	483.76
764.319	379.9	376.09	285.84	570.65	486.1
764.719	372.88	245.02	402.86	650.23	450.99
765.118	389.26	394.82	346.69	617.46	516.53
765.518	450.11	362.05	400.52	612.78	467.38
765.917	384.58	333.97	398.18	610.44	390.14
766.317	396.28	331.62	337.33	558.95	462.69
766.716	372.88	369.07	320.95	645.55	415.88
767.115	349.47	308.22	349.03	587.04	458.01
767.514	375.22	343.33	374.78	598.74	467.38
767.913	384.58	362.05	356.05	617.46	488.44
768.312	403.3	385.46	334.99	605.76	450.99
768.711	400.96	399.5	297.54	563.63	469.72
769.11	370.54	298.86	302.22	657.25	518.87
769.509	319.04	366.73	334.99	544.91	439.29
769.907	328.41	362.05	381.8	605.76	439.29
770.306	361.17	378.44	356.05	549.59	500.14
770.705	372.88	310.56	332.65	565.97	453.33
771.103	349.47	392.48	330.31	551.93	465.04
771.502	379.9	411.2	351.37	575.33	415.88
771.9	365.85	362.05	398.18	577.67	490.78
772.299	372.88	371.41	409.89	535.54	465.04
772.697	396.28	397.16	327.97	570.65	502.48
773.095	393.94	458.01	349.03	615.12	404.18
773.493	330.75	420.57	327.97	622.14	380.78
773.891	393.94	404.18	407.55	554.27	376.09
774.29	377.56	441.63	402.86	589.38	427.59
774.688	337.77	432.27	325.63	554.27	422.91
775.085	328.41	383.12	255.41	619.8	429.93
775.483	375.22	397.16	316.26	561.29	432.27
775.881	361.17	411.2	360.74	542.57	458.01
776.279	426.71	406.52	330.31	629.17	385.46
776.677	328.41	406.52	365.42	640.87	467.38
777.074	370.54	350.35	363.08	612.78	500.14
777.472	356.49	408.86	388.82	530.86	500.14
777.869	330.75	355.03	393.5	558.95	383.12
778.267	344.79	380.78	264.77	477.03	397.16
778.664	365.85	343.33	405.21	561.29	434.61
779.061	335.43	385.46	384.14	486.39	474.4
779.459	347.13	343.33	337.33	516.82	450.99
779.856	323.73	401.84	381.8	498.1	439.29
780.253	326.07	376.09	353.71	615.12	446.31
780.65	337.77	394.82	377.12	568.31	436.95
781.047	368.2	383.12	372.44	549.59	455.67
781.444	393.94	357.37	363.08	486.39	453.33
781.841	372.88	355.03	285.84	575.33	420.57
782.238	340.11	326.94	304.56	498.1	446.31
782.634	342.45	373.75	334.99	577.67	441.63
783.031	407.98	434.61	402.86	535.54	376.09
783.428	333.09	340.99	407.55	488.73	460.35
783.824	316.7	369.07	351.37	537.88	340.99
784.221	361.17	373.75	388.82	528.52	469.72
784.617	340.11	331.62	309.24	530.86	378.44
785.014	330.75	357.37	377.12	500.44	406.52
785.41	438.41	408.86	342.01	495.75	453.33
785.806	410.33	366.73	374.78	533.2	516.53
786.202	349.47	322.26	342.01	495.75	439.29
786.598	379.9	394.82	386.48	446.6	446.31
786.994	342.45	387.8	344.35	477.03	380.78
787.39	326.07	352.69	360.74	516.82	465.04
787.786	293.3	387.8	377.12	554.27	448.65
788.182	393.94	324.6	346.69	521.5	420.57
788.578	330.75	364.39	316.26	493.41	422.91
788.974	438.41	333.97	370.1	526.18	436.95
789.369	400.96	291.84	402.86	542.57	404.18
789.765	300.32	362.05	395.84	439.58	495.46
790.161	384.58	362.05	386.48	526.18	490.78
790.556	347.13	312.9	351.37	465.33	476.74
790.952	400.96	362.05	402.86	467.67	455.67
791.347	424.37	369.07	367.76	460.65	429.93
791.742	370.54	385.46	278.82	451.28	425.25
792.137	347.13	376.09	358.39	472.35	385.46
792.533	361.17	422.91	346.69	474.69	411.2
792.928	429.05	338.65	363.08	507.46	455.67
793.323	337.77	483.76	363.08	448.94	401.84
793.718	368.2	364.39	360.74	444.26	408.86
794.113	436.07	411.2	330.31	467.67	392.48
794.508	415.01	476.74	377.12	470.01	420.57
794.902	382.24	355.03	407.55	448.94	394.82
795.297	361.17	366.73	360.74	526.18	406.52
795.692	351.81	364.39	360.74	556.61	441.63
796.086	368.2	322.26	292.86	493.41	364.39
796.481	403.3	336.31	414.57	477.03	383.12
796.875	433.73	359.71	295.2	516.82	355.03
797.27	358.83	373.75	337.33	458.31	376.09
797.664	340.11	340.99	388.82	547.25	467.38
798.058	375.22	376.09	377.12	479.37	350.35
798.453	407.98	392.48	353.71	470.01	378.44
798.847	393.94	333.97	313.92	481.71	425.25
799.241	365.85	383.12	372.44	507.46	340.99
799.635	365.85	333.97	356.05	462.99	373.75
800.029	379.9	303.54	367.76	416.18	432.27
800.423	340.11	401.84	365.42	486.39	404.18
800.817	347.13	366.73	346.69	458.31	366.73
801.21	393.94	373.75	374.78	448.94	418.22
801.604	389.26	399.5	358.39	481.71	378.44
801.998	391.6	348.01	353.71	458.31	378.44
802.391	375.22	350.35	353.71	502.78	401.84
802.785	361.17	397.16	297.54	474.69	336.31
803.178	398.62	326.94	306.9	512.14	418.22
803.572	396.28	343.33	405.21	467.67	404.18
803.965	354.15	322.26	370.1	427.88	385.46
804.358	403.3	390.14	360.74	535.54	415.88
804.752	386.92	329.28	332.65	404.47	397.16
805.145	330.75	369.07	388.82	409.15	376.09
805.538	384.58	376.09	349.03	413.84	340.99
805.931	288.62	329.28	365.42	470.01	397.16
806.324	323.73	338.65	351.37	448.94	399.5
806.717	361.17	326.94	416.91	388.09	422.91
807.11	384.58	324.6	351.37	484.05	392.48
807.502	417.35	340.99	358.39	453.63	432.27
807.895	335.43	312.9	334.99	444.26	427.59
808.288	349.47	336.31	285.84	441.92	366.73
808.68	321.38	359.71	276.48	491.07	476.74
809.073	370.54	343.33	416.91	399.79	364.39
809.465	419.69	338.65	339.67	420.86	397.16
809.858	377.56	338.65	412.23	402.13	422.91
810.25	309.68	364.39	393.5	486.39	383.12
810.642	384.58	427.59	360.74	472.35	364.39
811.034	344.79	357.37	370.1	451.28	383.12
811.426	400.96	406.52	409.89	418.52	413.54
811.818	342.45	331.62	311.58	385.75	462.69
812.21	426.71	415.88	344.35	441.92	425.25
812.602	333.09	408.86	393.5	416.18	378.44
812.994	302.66	383.12	337.33	420.86	331.62
813.386	391.6	357.37	379.46	465.33	364.39
813.778	433.73	362.05	377.12	406.81	380.78
814.169	391.6	348.01	323.29	434.9	352.69
814.561	396.28	296.52	334.99	453.63	380.78
814.953	319.04	345.67	330.31	432.56	376.09
815.344	340.11	331.62	304.56	404.47	326.94
815.736	337.77	376.09	363.08	392.77	348.01
816.127	447.77	336.31	351.37	430.22	432.27
816.518	305	422.91	412.23	453.63	404.18
816.909	323.73	373.75	377.12	411.5	378.44
817.301	356.49	390.14	276.48	369.37	406.52
817.692	361.17	378.44	402.86	465.33	383.12
818.083	321.38	369.07	332.65	427.88	429.93
818.474	297.98	373.75	381.8	402.13	359.71
818.865	330.75	373.75	334.99	376.39	333.97
819.255	337.77	422.91	379.46	355.32	422.91
819.646	312.02	418.22	325.63	437.24	387.8
820.037	319.04	310.56	407.55	413.84	387.8
820.428	330.75	378.44	426.27	460.65	338.65
820.818	342.45	289.5	374.78	500.44	366.73
821.209	342.45	312.9	398.18	455.97	420.57
821.599	300.32	385.46	374.78	418.52	399.5
821.99	436.07	336.31	393.5	402.13	394.82
822.38	300.32	390.14	337.33	472.35	303.54
822.77	415.01	312.9	288.18	327.24	359.71
823.16	349.47	348.01	365.42	427.88	373.75
823.55	295.64	383.12	405.21	451.28	422.91
823.94	368.2	317.58	302.22	385.75	355.03
824.33	295.64	394.82	395.84	448.94	348.01
824.72	365.85	390.14	351.37	427.88	352.69
825.11	384.58	326.94	344.35	413.84	415.88
825.5	377.56	294.18	372.44	425.54	411.2
825.89	365.85	355.03	452.02	467.67	308.22
826.28	363.51	383.12	339.67	390.43	378.44
826.669	384.58	357.37	313.92	338.94	394.82
827.059	412.67	411.2	374.78	458.31	380.78
827.448	319.04	338.65	388.82	477.03	373.75
827.838	379.9	355.03	339.67	441.92	359.71
828.227	321.38	373.75	395.84	441.92	399.5
828.616	398.62	350.35	327.97	425.54	397.16
829.005	370.54	383.12	330.31	390.43	408.86
829.395	384.58	326.94	332.65	437.24	411.2
829.784	368.2	345.67	367.76	402.13	348.01
830.173	407.98	392.48	353.71	430.22	385.46
830.562	307.34	333.97	367.76	439.58	380.78
830.951	396.28	359.71	260.09	474.69	404.18
831.339	361.17	345.67	360.74	423.2	397.16
831.728	422.03	340.99	349.03	385.75	350.35
832.117	349.47	383.12	356.05	376.39	420.57
832.506	400.96	310.56	325.63	390.43	263.75
832.894	319.04	333.97	346.69	404.47	312.9
833.283	358.83	355.03	360.74	467.67	394.82
833.671	342.45	343.33	353.71	434.9	441.63
834.059	365.85	336.31	334.99	402.13	387.8
834.448	419.69	345.67	304.56	301.49	383.12
834.836	384.58	324.6	363.08	392.77	483.76
835.224	379.9	420.57	318.61	385.75	312.9
835.612	354.15	399.5	374.78	397.45	364.39
836	422.03	359.71	351.37	479.37	404.18
836.388	340.11	369.07	407.55	481.71	373.75
836.776	314.36	418.22	327.97	446.6	380.78
837.164	377.56	420.57	325.63	402.13	404.18
837.552	297.98	352.69	358.39	364.68	294.18
837.94	286.28	371.41	342.01	392.77	411.2
838.327	328.41	357.37	402.86	364.68	458.01
838.715	297.98	390.14	372.44	404.47	441.63
839.103	337.77	355.03	398.18	441.92	336.31
839.49	363.51	319.92	344.35	395.11	343.33
839.877	335.43	343.33	346.69	399.79	355.03
840.265	393.94	378.44	320.95	446.6	378.44
840.652	363.51	413.54	398.18	364.68	359.71
841.039	398.62	397.16	271.79	430.22	317.58
841.426	316.7	350.35	346.69	378.73	371.41
841.813	372.88	333.97	306.9	390.43	331.62
842.2	379.9	366.73	367.76	437.24	408.86
842.587	391.6	355.03	332.65	371.71	343.33
842.974	349.47	380.78	349.03	399.79	443.97
843.361	330.75	352.69	386.48	420.86	376.09
843.748	358.83	399.5	351.37	287.45	343.33
844.134	391.6	429.93	409.89	451.28	352.69
844.521	391.6	340.99	402.86	399.79	376.09
844.908	328.41	413.54	344.35	385.75	329.28
845.294	305	324.6	405.21	409.15	345.67
845.681	389.26	394.82	309.24	390.43	352.69
846.067	377.56	359.71	360.74	439.58	357.37
846.453	344.79	352.69	288.18	357.66	364.39
846.839	361.17	340.99	342.01	388.09	331.62
847.226	400.96	399.5	316.26	418.52	392.48
847.612	377.56	317.58	274.14	455.97	352.69
847.998	319.04	324.6	416.91	371.71	392.48
848.384	354.15	418.22	332.65	439.58	387.8
848.77	354.15	366.73	323.29	439.58	413.54
849.155	335.43	324.6	384.14	390.43	397.16
849.541	342.45	406.52	414.57	395.11	380.78
849.927	375.22	380.78	384.14	381.07	415.88
850.312	438.41	329.28	346.69	404.47	390.14
850.698	326.07	336.31	337.33	395.11	317.58
851.084	326.07	329.28	353.71	427.88	380.78
851.469	321.38	343.33	363.08	416.18	380.78
851.854	375.22	357.37	330.31	413.84	366.73
852.24	349.47	401.84	349.03	388.09	408.86
852.625	377.56	345.67	325.63	364.68	359.71
853.01	340.11	397.16	356.05	348.3	371.41
853.395	398.62	385.46	327.97	383.41	376.09
853.78	361.17	401.84	400.52	420.86	411.2
854.165	351.81	392.48	311.58	406.81	385.46
854.55	351.81	401.84	356.05	409.15	343.33
854.935	379.9	305.88	288.18	402.13	380.78
855.32	297.98	401.84	344.35	474.69	331.62
855.704	377.56	322.26	365.42	441.92	340.99
856.089	386.92	280.13	381.8	345.96	326.94
856.474	368.2	406.52	377.12	418.52	404.18
856.858	410.33	380.78	365.42	395.11	319.92
857.243	330.75	378.44	313.92	357.66	338.65
857.627	337.77	362.05	297.54	378.73	394.82
858.011	370.54	359.71	398.18	362.34	359.71
858.396	384.58	404.18	409.89	395.11	308.22
858.78	354.15	404.18	339.67	411.5	369.07
859.164	314.36	348.01	346.69	378.73	336.31
859.548	393.94	385.46	360.74	462.99	340.99
859.932	358.83	319.92	360.74	357.66	380.78
860.316	328.41	415.88	337.33	397.45	359.71
860.7	386.92	406.52	381.8	409.15	362.05
861.083	288.62	355.03	339.67	458.31	378.44
861.467	389.26	355.03	393.5	388.09	385.46
861.851	384.58	406.52	356.05	420.86	301.2
862.234	337.77	333.97	330.31	341.28	254.39
862.618	393.94	394.82	374.78	479.37	291.84
863.001	344.79	350.35	367.76	479.37	413.54
863.385	382.24	326.94	292.86	425.54	336.31
863.768	323.73	305.88	372.44	399.79	383.12
864.151	309.68	329.28	349.03	458.31	387.8
864.534	309.68	373.75	377.12	331.92	364.39
864.918	340.11	376.09	325.63	378.73	298.86
865.301	321.38	397.16	274.14	369.37	373.75
865.684	326.07	385.46	384.14	399.79	415.88
866.066	333.09	322.26	325.63	381.07	333.97
866.449	351.81	425.25	344.35	364.68	383.12
866.832	342.45	355.03	346.69	378.73	303.54
867.215	328.41	319.92	316.26	430.22	383.12
867.597	344.79	355.03	372.44	381.07	376.09
867.98	391.6	333.97	346.69	404.47	385.46
868.363	349.47	380.78	323.29	399.79	387.8
868.745	293.3	411.2	423.93	425.54	319.92
869.127	379.9	392.48	365.42	390.43	406.52
869.51	377.56	415.88	351.37	362.34	312.9
869.892	368.2	310.56	311.58	397.45	345.67
870.274	370.54	362.05	342.01	404.47	357.37
870.656	384.58	420.57	311.58	364.68	429.93
871.038	349.47	369.07	339.67	460.65	408.86
871.42	384.58	324.6	402.86	474.69	399.5
871.802	365.85	364.39	377.12	397.45	331.62
872.184	349.47	404.18	351.37	458.31	369.07
872.566	337.77	345.67	386.48	437.24	345.67
872.948	422.03	305.88	311.58	416.18	362.05
873.329	393.94	385.46	386.48	427.88	324.6
873.711	361.17	373.75	320.95	345.96	394.82
874.092	347.13	312.9	290.52	381.07	310.56
874.474	347.13	364.39	395.84	371.71	326.94
874.855	319.04	362.05	344.35	383.41	343.33
875.236	361.17	425.25	349.03	484.05	371.41
875.618	293.3	336.31	274.14	357.66	345.67
875.999	333.09	357.37	367.76	376.39	378.44
876.38	361.17	364.39	302.22	357.66	439.29
876.761	305	394.82	309.24	423.2	366.73
877.142	274.57	315.24	334.99	381.07	343.33
877.523	305	345.67	405.21	317.87	355.03
877.904	307.34	397.16	405.21	341.28	333.97
878.285	363.51	369.07	349.03	434.9	256.73
878.665	326.07	317.58	353.71	458.31	355.03
879.046	286.28	366.73	388.82	395.11	404.18
879.426	316.7	364.39	349.03	367.03	355.03
879.807	312.02	343.33	353.71	430.22	376.09
880.187	372.88	352.69	339.67	327.24	376.09
880.568	391.6	336.31	332.65	343.62	331.62
880.948	382.24	373.75	356.05	388.09	364.39
881.328	372.88	355.03	386.48	397.45	340.99
881.708	351.81	324.6	360.74	423.2	359.71
882.089	368.2	352.69	367.76	338.94	378.44
882.469	297.98	303.54	309.24	390.43	338.65
882.849	335.43	387.8	367.76	406.81	392.48
883.228	330.75	336.31	344.35	331.92	385.46
883.608	405.64	362.05	337.33	369.37	376.09
883.988	389.26	399.5	349.03	345.96	324.6
884.368	405.64	366.73	381.8	437.24	340.99
884.747	410.33	357.37	423.93	345.96	383.12
885.127	384.58	359.71	365.42	369.37	350.35
885.506	422.03	385.46	456.7	355.32	303.54
885.886	363.51	390.14	377.12	399.79	371.41
886.265	342.45	373.75	374.78	357.66	329.28
886.645	321.38	312.9	372.44	362.34	322.26
887.024	370.54	352.69	372.44	388.09	277.79
887.403	333.09	364.39	342.01	376.39	422.91
887.782	363.51	338.65	377.12	413.84	404.18
888.161	349.47	326.94	377.12	369.37	303.54
888.54	342.45	291.84	351.37	484.05	436.95
888.919	354.15	343.33	388.82	355.32	385.46
889.298	377.56	336.31	388.82	383.41	397.16
889.676	410.33	383.12	320.95	355.32	336.31
890.055	314.36	345.67	349.03	383.41	362.05
890.434	368.2	383.12	346.69	432.56	366.73
890.812	344.79	385.46	393.5	418.52	345.67
891.191	323.73	387.8	323.29	451.28	404.18
891.569	344.79	308.22	250.73	432.56	401.84
891.948	377.56	303.54	320.95	418.52	305.88
892.326	333.09	331.62	367.76	374.05	308.22
892.704	326.07	369.07	320.95	362.34	401.84
893.082	340.11	366.73	290.52	364.68	387.8
893.46	358.83	378.44	337.33	477.03	397.16
893.838	379.9	305.88	339.67	329.58	427.59
894.216	279.26	404.18	349.03	367.03	326.94
894.594	293.3	404.18	367.76	451.28	383.12
894.972	333.09	364.39	339.67	404.47	343.33
895.35	314.36	399.5	344.35	455.97	362.05
895.727	326.07	277.79	363.08	378.73	324.6
896.105	330.75	383.12	344.35	364.68	326.94
896.482	347.13	355.03	400.52	406.81	340.99
896.86	382.24	425.25	377.12	383.41	385.46
897.237	354.15	348.01	388.82	399.79	343.33
897.615	382.24	333.97	360.74	374.05	390.14
897.992	389.26	434.61	332.65	367.03	392.48
898.369	361.17	373.75	285.84	406.81	366.73
898.746	344.79	305.88	344.35	352.98	317.58
899.123	363.51	369.07	356.05	441.92	446.31
899.5	354.15	366.73	416.91	465.33	394.82
899.877	312.02	408.86	370.1	322.56	340.99
900.254	340.11	383.12	337.33	350.64	326.94
900.631	326.07	333.97	370.1	427.88	359.71
901.007	382.24	348.01	400.52	355.32	371.41
901.384	382.24	298.86	309.24	451.28	312.9
901.761	290.96	296.52	374.78	350.64	376.09
902.137	379.9	340.99	395.84	374.05	364.39
902.514	349.47	362.05	271.79	334.26	432.27
902.89	354.15	439.29	290.52	362.34	348.01
903.266	297.98	364.39	320.95	388.09	324.6
903.642	305	376.09	325.63	402.13	364.39
904.019	433.73	366.73	372.44	338.94	364.39
904.395	356.49	352.69	372.44	381.07	392.48
904.771	340.11	326.94	339.67	390.43	406.52
905.147	316.7	350.35	325.63	374.05	376.09
905.523	330.75	331.62	356.05	413.84	242.68
905.898	328.41	373.75	337.33	411.5	350.35
906.274	295.64	380.78	323.29	418.52	378.44
906.65	398.62	369.07	302.22	399.79	376.09
907.026	363.51	315.24	374.78	423.2	336.31
907.401	407.98	324.6	316.26	350.64	383.12
907.777	286.28	415.88	414.57	437.24	399.5
908.152	405.64	296.52	327.97	427.88	376.09
908.527	405.64	348.01	320.95	338.94	392.48
908.903	316.7	376.09	358.39	416.18	345.67
909.278	349.47	376.09	337.33	411.5	369.07
909.653	368.2	333.97	349.03	460.65	432.27
910.028	337.77	399.5	278.82	427.88	392.48
910.403	314.36	355.03	316.26	322.56	280.13
910.778	415.01	373.75	358.39	411.5	336.31
911.153	356.49	345.67	405.21	381.07	380.78
911.528	417.35	301.2	330.31	411.5	495.46
911.902	365.85	404.18	323.29	432.56	350.35
912.277	330.75	415.88	351.37	308.51	369.07
912.652	393.94	364.39	372.44	427.88	261.41
913.026	393.94	406.52	381.8	329.58	376.09
913.4	340.11	411.2	367.76	409.15	359.71
913.775	436.07	322.26	342.01	299.15	333.97
914.149	342.45	390.14	327.97	367.03	343.33
914.523	379.9	322.26	309.24	376.39	411.2
914.898	337.77	380.78	374.78	374.05	378.44
915.272	365.85	401.84	386.48	409.15	348.01
915.646	344.79	362.05	337.33	343.62	329.28
916.02	382.24	324.6	330.31	406.81	310.56
916.394	265.21	427.59	358.39	374.05	284.81
916.767	337.77	376.09	288.18	376.39	305.88
917.141	426.71	383.12	302.22	390.43	373.75
917.515	316.7	338.65	330.31	395.11	429.93
917.888	326.07	310.56	358.39	397.45	331.62
918.262	356.49	263.75	363.08	371.71	333.97
918.635	347.13	294.18	342.01	402.13	376.09
919.009	344.79	308.22	395.84	381.07	312.9
919.382	335.43	439.29	419.25	388.09	355.03
919.756	363.51	369.07	372.44	420.86	324.6
920.129	370.54	369.07	407.55	334.26	319.92
920.502	333.09	376.09	332.65	357.66	312.9
920.875	386.92	350.35	391.16	385.75	343.33
921.248	419.69	439.29	365.42	388.09	373.75
921.621	354.15	301.2	416.91	385.75	408.86
921.994	340.11	329.28	327.97	338.94	373.75
922.366	349.47	350.35	342.01	369.37	357.37
922.739	365.85	357.37	384.14	364.68	357.37
923.112	405.64	350.35	400.52	509.8	397.16
923.484	405.64	364.39	337.33	420.86	282.47
923.857	361.17	303.54	283.5	383.41	369.07
924.229	337.77	352.69	318.61	430.22	373.75
924.602	351.81	420.57	358.39	432.56	326.94
924.974	319.04	348.01	313.92	402.13	376.09
925.346	351.81	401.84	414.57	334.26	256.73
925.718	405.64	319.92	349.03	390.43	319.92
926.091	328.41	362.05	353.71	367.03	378.44
926.463	377.56	369.07	381.8	360	401.84
926.835	309.68	420.57	388.82	418.52	378.44
927.206	400.96	397.16	367.76	381.07	408.86
927.578	309.68	340.99	349.03	418.52	336.31
927.95	365.85	343.33	356.05	453.63	404.18
928.322	361.17	394.82	313.92	341.28	355.03
928.693	389.26	331.62	384.14	395.11	385.46
929.065	368.2	371.41	349.03	362.34	371.41
929.436	389.26	385.46	344.35	390.43	397.16
929.808	379.9	324.6	330.31	360	331.62
930.179	288.62	345.67	267.11	341.28	336.31
930.55	396.28	366.73	316.26	378.73	425.25
930.921	347.13	324.6	306.9	315.53	329.28
931.293	382.24	336.31	370.1	310.85	385.46
931.664	316.7	376.09	391.16	392.77	352.69
932.035	368.2	373.75	346.69	425.54	355.03
932.406	333.09	350.35	379.46	392.77	338.65
932.776	375.22	371.41	374.78	390.43	350.35
933.147	405.64	373.75	313.92	331.92	345.67
933.518	302.66	411.2	318.61	413.84	338.65
933.888	347.13	397.16	349.03	336.6	387.8
934.259	410.33	329.28	337.33	306.17	326.94
934.63	365.85	329.28	316.26	409.15	348.01
935	389.26	303.54	379.46	369.37	383.12
935.37	319.04	387.8	353.71	374.05	425.25
935.741	314.36	315.24	344.35	390.43	362.05
936.111	316.7	383.12	363.08	418.52	392.48
936.481	351.81	392.48	332.65	409.15	336.31
936.851	293.3	343.33	421.59	364.68	406.52
937.221	351.81	343.33	346.69	352.98	357.37
937.591	372.88	296.52	309.24	362.34	310.56
937.961	363.51	350.35	384.14	395.11	326.94
938.331	377.56	383.12	351.37	362.34	364.39
938.7	450.11	333.97	358.39	399.79	390.14
939.07	302.66	352.69	316.26	418.52	345.67
939.44	335.43	333.97	330.31	376.39	462.69
939.809	396.28	268.43	377.12	383.41	387.8
940.178	351.81	373.75	379.46	343.62	322.26
940.548	342.45	366.73	283.5	381.07	399.5
940.917	337.77	422.91	379.46	348.3	340.99
941.286	372.88	352.69	306.9	388.09	343.33
941.656	347.13	366.73	306.9	381.07	352.69
942.025	400.96	369.07	356.05	376.39	371.41
942.394	415.01	322.26	325.63	399.79	324.6
942.763	389.26	340.99	285.84	374.05	362.05
943.131	377.56	343.33	370.1	430.22	404.18
943.5	356.49	373.75	332.65	432.56	348.01
943.869	321.38	348.01	358.39	406.81	366.73
944.238	333.09	394.82	402.86	390.43	324.6
944.606	386.92	338.65	337.33	367.03	376.09
944.975	347.13	333.97	267.11	423.2	350.35
945.343	445.43	261.41	313.92	444.26	322.26
945.712	333.09	336.31	381.8	388.09	387.8
946.08	396.28	406.52	330.31	418.52	404.18
946.448	347.13	317.58	344.35	388.09	387.8
946.816	337.77	362.05	327.97	378.73	291.84
947.184	368.2	350.35	304.56	392.77	408.86
947.552	424.37	364.39	351.37	364.68	376.09
947.92	361.17	333.97	367.76	338.94	415.88
948.288	403.3	355.03	365.42	416.18	310.56
948.656	361.17	338.65	320.95	383.41	322.26
949.024	361.17	310.56	304.56	399.79	362.05
949.392	323.73	383.12	327.97	427.88	378.44
949.759	405.64	324.6	325.63	425.54	408.86
950.127	365.85	336.31	353.71	360	340.99
950.494	293.3	397.16	302.22	362.34	343.33
950.862	349.47	420.57	393.5	404.47	352.69
951.229	452.45	331.62	363.08	409.15	319.92
951.596	370.54	357.37	327.97	420.86	366.73
951.963	347.13	298.86	323.29	308.51	366.73
952.33	347.13	319.92	400.52	348.3	366.73
952.697	333.09	322.26	325.63	388.09	333.97
953.064	305	366.73	313.92	385.75	345.67
953.431	335.43	350.35	381.8	296.81	378.44
953.798	309.68	359.71	370.1	376.39	242.68
954.165	370.54	312.9	313.92	336.6	373.75
954.532	405.64	390.14	346.69	397.45	418.22
954.898	293.3	355.03	351.37	378.73	364.39
955.265	307.34	371.41	332.65	329.58	366.73
955.631	361.17	380.78	393.5	411.5	364.39
955.998	368.2	362.05	346.69	367.03	336.31
956.364	276.91	348.01	334.99	383.41	376.09
956.73	300.32	350.35	379.46	388.09	383.12
957.096	316.7	385.46	332.65	345.96	369.07
957.463	330.75	333.97	302.22	343.62	345.67
957.829	356.49	385.46	260.09	345.96	397.16
958.195	386.92	340.99	337.33	437.24	369.07
958.56	365.85	301.2	356.05	416.18	378.44
958.926	335.43	355.03	351.37	348.3	362.05
959.292	305	348.01	330.31	371.71	373.75
959.658	347.13	317.58	318.61	395.11	310.56
960.023	351.81	333.97	363.08	324.9	357.37
960.389	370.54	373.75	395.84	411.5	315.24
960.754	326.07	373.75	407.55	374.05	348.01
961.12	377.56	406.52	339.67	352.98	378.44
961.485	375.22	355.03	274.14	355.32	420.57
961.85	340.11	324.6	365.42	385.75	429.93
962.216	391.6	317.58	339.67	390.43	343.33
962.581	424.37	378.44	323.29	418.52	387.8
962.946	314.36	319.92	349.03	348.3	362.05
963.311	379.9	322.26	395.84	399.79	331.62
963.676	375.22	343.33	311.58	355.32	373.75
964.041	335.43	345.67	353.71	357.66	343.33
964.405	379.9	385.46	337.33	409.15	343.33
964.77	349.47	434.61	353.71	345.96	352.69
965.135	405.64	338.65	363.08	343.62	385.46
965.499	393.94	366.73	325.63	451.28	359.71
965.864	372.88	326.94	299.88	392.77	385.46
966.228	340.11	392.48	325.63	348.3	343.33
966.592	333.09	376.09	365.42	362.34	357.37
966.957	328.41	340.99	318.61	352.98	340.99
967.321	337.77	336.31	365.42	397.45	404.18
967.685	354.15	350.35	386.48	385.75	345.67
968.049	379.9	373.75	402.86	355.32	404.18
968.413	307.34	387.8	274.14	367.03	392.48
968.777	375.22	362.05	325.63	371.71	305.88
969.141	262.87	387.8	288.18	350.64	308.22
969.504	358.83	390.14	377.12	444.26	326.94
969.868	368.2	345.67	400.52	362.34	378.44
970.232	358.83	329.28	386.48	360	350.35
970.595	351.81	413.54	388.82	441.92	422.91
970.959	356.49	385.46	309.24	378.73	364.39
971.322	323.73	348.01	367.76	350.64	387.8
971.686	398.62	387.8	342.01	367.03	366.73
972.049	361.17	387.8	391.16	378.73	296.52
972.412	382.24	401.84	356.05	397.45	312.9
972.775	379.9	359.71	372.44	406.81	364.39
973.138	321.38	331.62	349.03	355.32	301.2
973.501	396.28	333.97	398.18	392.77	378.44
973.864	349.47	357.37	388.82	341.28	366.73
974.227	363.51	378.44	358.39	383.41	329.28
974.59	293.3	333.97	416.91	411.5	383.12
974.952	337.77	366.73	349.03	404.47	392.48
975.315	342.45	362.05	426.27	404.47	348.01
975.677	286.28	326.94	356.05	392.77	369.07
976.04	293.3	404.18	246.05	404.47	448.65
976.402	365.85	310.56	327.97	367.03	322.26
976.765	356.49	331.62	381.8	402.13	336.31
977.127	349.47	329.28	332.65	402.13	378.44
977.489	386.92	312.9	395.84	413.84	343.33
977.851	276.91	345.67	330.31	378.73	378.44
978.213	333.09	355.03	344.35	341.28	366.73
978.575	300.32	310.56	257.75	441.92	359.71
978.937	342.45	340.99	332.65	381.07	319.92
979.299	337.77	362.05	320.95	313.19	333.97
979.661	372.88	336.31	330.31	397.45	333.97
980.022	312.02	411.2	332.65	388.09	298.86
980.384	398.62	350.35	299.88	331.92	362.05
980.745	297.98	324.6	318.61	432.56	312.9
981.107	328.41	399.5	278.82	392.77	319.92
981.468	293.3	392.48	372.44	392.77	418.22
981.83	347.13	336.31	337.33	360	397.16
982.191	321.38	352.69	339.67	416.18	399.5
982.552	344.79	324.6	367.76	397.45	385.46
982.913	333.09	315.24	342.01	376.39	369.07
983.274	445.43	322.26	295.2	352.98	427.59
983.635	384.58	223.96	344.35	350.64	394.82
983.996	305	315.24	320.95	341.28	324.6
984.357	377.56	376.09	288.18	378.73	364.39
984.718	386.92	376.09	370.1	322.56	348.01
985.078	363.51	455.67	323.29	381.07	404.18
985.439	389.26	401.84	356.05	360	378.44
985.799	377.56	366.73	316.26	420.86	291.84
986.16	365.85	340.99	327.97	374.05	336.31
986.52	333.09	392.48	360.74	369.37	331.62
986.88	335.43	357.37	313.92	315.53	383.12
987.241	340.11	298.86	316.26	378.73	338.65
987.601	347.13	359.71	332.65	367.03	331.62
987.961	365.85	357.37	395.84	418.52	303.54
988.321	368.2	294.18	374.78	341.28	352.69
988.681	382.24	411.2	374.78	404.47	397.16
989.041	389.26	392.48	374.78	392.77	378.44
989.4	347.13	338.65	323.29	402.13	296.52
989.76	365.85	336.31	330.31	470.01	305.88
990.12	379.9	268.43	344.35	402.13	357.37
990.479	349.47	326.94	306.9	345.96	319.92
990.839	340.11	373.75	325.63	367.03	315.24
991.198	300.32	406.52	407.55	315.53	296.52
991.558	328.41	364.39	288.18	444.26	343.33
991.917	354.15	371.41	332.65	413.84	340.99
992.276	412.67	401.84	402.86	381.07	364.39
992.635	407.98	294.18	421.59	350.64	352.69
992.994	333.09	333.97	342.01	343.62	310.56
993.353	365.85	406.52	351.37	397.45	329.28
993.712	326.07	390.14	384.14	392.77	343.33
994.071	412.67	397.16	278.82	404.47	303.54
994.43	316.7	343.33	334.99	388.09	408.86
994.789	340.11	390.14	356.05	385.75	369.07
995.147	267.55	338.65	360.74	458.31	350.35
995.506	330.75	366.73	367.76	376.39	343.33
995.864	300.32	418.22	332.65	369.37	338.65
996.223	316.7	338.65	379.46	388.09	357.37
996.581	403.3	329.28	372.44	360	305.88
996.939	330.75	331.62	281.16	376.39	315.24
997.297	323.73	326.94	381.8	374.05	324.6
997.656	309.68	371.41	318.61	369.37	406.52
998.014	344.79	345.67	332.65	331.92	373.75
998.372	379.9	340.99	299.88	388.09	301.2
998.729	342.45	446.31	325.63	397.45	296.52
999.087	349.47	359.71	365.42	413.84	329.28
999.445	323.73	333.97	377.12	420.86	348.01
999.803	396.28	373.75	365.42	406.81	340.99
1000.16	382.24	376.09	316.26	378.73	364.39
1000.52	349.47	376.09	360.74	406.81	399.5
1000.88	361.17	343.33	377.12	364.68	336.31
1001.23	372.88	329.28	372.44	381.07	378.44
1001.59	351.81	312.9	311.58	364.68	333.97
1001.95	293.3	303.54	299.88	374.05	317.58
1002.3	309.68	350.35	281.16	350.64	338.65
1002.66	302.66	343.33	330.31	371.71	369.07
1003.02	368.2	308.22	309.24	390.43	362.05
1003.38	368.2	338.65	409.89	395.11	380.78
1003.73	370.54	352.69	391.16	385.75	326.94
1004.09	314.36	352.69	330.31	448.94	326.94
1004.45	379.9	418.22	353.71	385.75	352.69
1004.8	407.98	350.35	344.35	413.84	319.92
1005.16	389.26	322.26	337.33	411.5	282.47
1005.52	354.15	291.84	295.2	378.73	322.26
1005.87	386.92	319.92	325.63	385.75	289.5
1006.23	344.79	357.37	323.29	430.22	282.47
1006.59	368.2	333.97	332.65	322.56	397.16
1006.94	377.56	394.82	372.44	348.3	340.99
1007.3	372.88	359.71	327.97	374.05	333.97
1007.65	244.15	298.86	370.1	360	387.8
1008.01	293.3	420.57	379.46	413.84	406.52
1008.37	347.13	301.2	342.01	327.24	385.46
1008.72	319.04	392.48	309.24	467.67	404.18
1009.08	335.43	399.5	330.31	343.62	319.92
1009.43	375.22	345.67	360.74	439.58	324.6
1009.79	356.49	387.8	281.16	416.18	324.6
1010.14	328.41	364.39	407.55	362.34	401.84
1010.5	309.68	331.62	302.22	404.47	340.99
1010.85	382.24	357.37	339.67	413.84	345.67
1011.21	333.09	429.93	370.1	301.49	329.28
1011.57	384.58	343.33	306.9	383.41	366.73
1011.92	309.68	345.67	356.05	395.11	317.58
1012.27	337.77	376.09	320.95	406.81	324.6
1012.63	354.15	350.35	358.39	369.37	331.62
1012.99	335.43	312.9	327.97	397.45	303.54
1013.34	305	282.47	346.69	432.56	378.44
1013.7	281.6	383.12	367.76	350.64	284.81
1014.05	361.17	411.2	381.8	378.73	343.33
1014.4	386.92	301.2	349.03	303.83	343.33
1014.76	344.79	390.14	349.03	331.92	310.56
1015.11	335.43	373.75	344.35	360	319.92
1015.47	351.81	355.03	386.48	388.09	343.33
1015.82	307.34	275.45	365.42	341.28	343.33
1016.18	356.49	345.67	325.63	388.09	376.09
1016.53	307.34	333.97	363.08	402.13	270.77
1016.88	349.47	355.03	332.65	402.13	280.13
1017.24	363.51	369.07	330.31	360	357.37
1017.59	363.51	357.37	358.39	402.13	310.56
1017.95	356.49	298.86	342.01	388.09	322.26
[truncated: 49 more rows]

## Sheet: Fig 4
Species	Replicate	Time	Fo (Fs)	Fm (Fm')
Sargassum vulgare	1	-30	231.32	925.39
Sargassum vulgare	1	0	217.19	307.64
Sargassum vulgare	1	2	235.44	375.63
Sargassum vulgare	1	4	229.04	389.96
Sargassum vulgare	1	6	224.18	396.87
Sargassum vulgare	1	8	223.41	405.41
Sargassum vulgare	1	10	219.84	413.04
Sargassum vulgare	1	12	214.28	414.32
Sargassum vulgare	1	14	215.26	422.21
Sargassum vulgare	2	-30	204.53	821.39
Sargassum vulgare	2	0	178.58	255.07
Sargassum vulgare	2	2	192.3	302.18
Sargassum vulgare	2	4	186.21	313.46
Sargassum vulgare	2	6	183.7	320.57
Sargassum vulgare	2	8	181.05	329.32
Sargassum vulgare	2	10	177.51	326.83
Sargassum vulgare	2	12	176.15	333.74
Sargassum vulgare	2	14	173.48	343.48
Sargassum vulgare	3	-30	256.75	1056.64
Sargassum vulgare	3	0	223.42	320.49
Sargassum vulgare	3	2	244.75	391.11
Sargassum vulgare	3	4	239.8	407.73
Sargassum vulgare	3	6	239.49	419.25
Sargassum vulgare	3	8	235.98	430.22
Sargassum vulgare	3	10	231.61	435.67
Sargassum vulgare	3	12	227.75	439.11
Sargassum vulgare	3	14	226.91	449.43
Fucus vesiculosus	1	-30	377.49	1137.71
Fucus vesiculosus	1	0	250.97	324.56
Fucus vesiculosus	1	2	350.44	583.88
Fucus vesiculosus	1	4	382.35	695.11
Fucus vesiculosus	1	6	407.87	794.75
Fucus vesiculosus	1	8	410.4	859.14
Fucus vesiculosus	1	10	433.52	939.71
Fucus vesiculosus	1	12	436.87	986.52
Fucus vesiculosus	1	14	438.16	1028.91
Fucus vesiculosus	2	-30	468.93	1018.15
Fucus vesiculosus	2	0	262.42	365.23
Fucus vesiculosus	2	2	361.06	675.57
Fucus vesiculosus	2	4	382.03	772.29
Fucus vesiculosus	2	6	402.13	861.91
Fucus vesiculosus	2	8	405.58	909.22
Fucus vesiculosus	2	10	412.61	984.49
Fucus vesiculosus	2	12	414.34	1021.66
Fucus vesiculosus	2	14	408.42	1051.19
Bifurcaria bifurcata	1	-30	305.375	1243.51
Bifurcaria bifurcata	1	0	217.85	272.61
Bifurcaria bifurcata	1	2	225.69	314.28
Bifurcaria bifurcata	1	4	227.78	322.99
Bifurcaria bifurcata	1	6	232.72	343.97
Bifurcaria bifurcata	1	8	235.88	348.82
Bifurcaria bifurcata	1	10	247.52	388.29
Bifurcaria bifurcata	1	12	256.59	420.6
Bifurcaria bifurcata	1	14	267.16	454.81
Bifurcaria bifurcata	2	-30	301.688	1161.92
Bifurcaria bifurcata	2	0	163.38	212.44
Bifurcaria bifurcata	2	2	163.16	224.48
Bifurcaria bifurcata	2	4	162.08	237.86
Bifurcaria bifurcata	2	6	168.26	251.15
Bifurcaria bifurcata	2	8	173.56	265.66
Bifurcaria bifurcata	2	10	174.86	277.55
Bifurcaria bifurcata	2	12	178.23	283.23
Bifurcaria bifurcata	2	14	186.09	310.58
Bifurcaria bifurcata	3	-30	293.905	1124.56
Bifurcaria bifurcata	3	0	172.53	218.31
Bifurcaria bifurcata	3	2	175.02	237.61
Bifurcaria bifurcata	3	4	172.13	247.7
Bifurcaria bifurcata	3	6	174.62	257.08
Bifurcaria bifurcata	3	8	185.8	280.95
Bifurcaria bifurcata	3	10	189.85	289.34
Bifurcaria bifurcata	3	12	192.62	299.36
Bifurcaria bifurcata	3	14	200.59	327.39
Sacchoriza polyschides	1	-30	294.507	1187.69
Sacchoriza polyschides	1	0	259.16	372.7
Sacchoriza polyschides	1	2	330.06	548.26
Sacchoriza polyschides	1	4	353.14	613.99
Sacchoriza polyschides	1	6	370.06	666.48
Sacchoriza polyschides	1	8	375.12	721.21
Sacchoriza polyschides	1	10	385.39	764.1
Sacchoriza polyschides	1	12	385.25	786.49
Sacchoriza polyschides	1	14	380.86	810.17
Sacchoriza polyschides	2	-30	287.033	1125.88
Sacchoriza polyschides	2	0	254.76	363.45
Sacchoriza polyschides	2	2	328.62	535.61
Sacchoriza polyschides	2	4	348.54	599.61
Sacchoriza polyschides	2	6	363.55	657.92
Sacchoriza polyschides	2	8	368.9	701.78
Sacchoriza polyschides	2	10	378.06	757.85
Sacchoriza polyschides	2	12	383.12	791.78
Sacchoriza polyschides	2	14	384.57	818.04
Sacchoriza polyschides	3	-30	308.33	1266.19
Sacchoriza polyschides	3	0	279.09	425.86
Sacchoriza polyschides	3	2	354.41	613.07
Sacchoriza polyschides	3	4	373.54	685.14
Sacchoriza polyschides	3	6	387.71	748.08
Sacchoriza polyschides	3	8	389.28	801.11
Sacchoriza polyschides	3	10	401.22	834.76
Sacchoriza polyschides	3	12	404.56	865.69
Sacchoriza polyschides	3	14	404.19	898.62
Corallina officinalis	1	-30	388.118	865.26
Corallina officinalis	1	0	517.47	600.57
Corallina officinalis	1	2	490.02	627.22
Corallina officinalis	1	4	475.22	650
Corallina officinalis	1	6	466.63	636.18
Corallina officinalis	1	8	469.17	639.35
Corallina officinalis	1	10	443.48	627.05
Corallina officinalis	1	12	440.41	623.48
Corallina officinalis	1	14	431.79	616.14
Corallina officinalis	2	-30	414.685	834.265
Corallina officinalis	2	0	420.23	464.63
Corallina officinalis	2	2	386.07	476.24
Corallina officinalis	2	4	376.82	485.47
Corallina officinalis	2	6	369.64	477.69
Corallina officinalis	2	8	392.01	505.87
Corallina officinalis	2	10	358.28	477.76
Corallina officinalis	2	12	347.14	466.63
Corallina officinalis	2	14	353.11	475.7
Corallina officinalis	3	-30	352.055	771.227
Corallina officinalis	3	0	504.02	564.66
Corallina officinalis	3	2	471.64	571.44
Corallina officinalis	3	4	461.1	569.25
Corallina officinalis	3	6	451.08	566.11
Corallina officinalis	3	8	467.76	587.5
Corallina officinalis	3	10	441.89	564.02
Corallina officinalis	3	12	437.77	562.57
Corallina officinalis	3	14	434.65	559.89
Porphyra leucosticta	1	-30	133.512	444.058
Porphyra leucosticta	1	0	174.48	226.57
Porphyra leucosticta	1	2	160.01	238.78
Porphyra leucosticta	1	4	155.47	252.83
Porphyra leucosticta	1	6	154.7	268.46
Porphyra leucosticta	1	8	150.56	274.91
Porphyra leucosticta	1	10	151.95	285.78
Porphyra leucosticta	1	12	147.91	282.98
Porphyra leucosticta	1	14	146.61	287.85
Porphyra leucosticta	2	-30	182.807	584.88
Porphyra leucosticta	2	0	253.52	313.6
Porphyra leucosticta	2	2	235.47	340.84
Porphyra leucosticta	2	4	232.35	357.4
Porphyra leucosticta	2	6	231.55	375.87
Porphyra leucosticta	2	8	230.52	390.21
Porphyra leucosticta	2	10	224.59	396.02
Porphyra leucosticta	2	12	220.02	394.12
Porphyra leucosticta	2	14	215.86	403.41
Porphyra leucosticta	3	-30	215.25	671.297
Porphyra leucosticta	3	0	303.5	385.03
Porphyra leucosticta	3	2	292.21	428.13
Porphyra leucosticta	3	4	285.22	450.27
Porphyra leucosticta	3	6	284.41	460.16
Porphyra leucosticta	3	8	284.68	470.49
Porphyra leucosticta	3	10	275.73	482.95
Porphyra leucosticta	3	12	273.15	486.19
Porphyra leucosticta	3	14	269.28	494.17
Ulva lactuca	1	-30	184.94	796.957
Ulva lactuca	1	0	340.63	513.59
Ulva lactuca	1	2	300.09	582.36
Ulva lactuca	1	4	277.06	574.99
Ulva lactuca	1	6	263.84	574.88
Ulva lactuca	1	8	254.36	576.1
Ulva lactuca	1	10	245.65	584.02
Ulva lactuca	1	12	241.34	586.76
Ulva lactuca	1	14	235.21	587.79
Ulva lactuca	2	-30	209.307	896.328
Ulva lactuca	2	0	360.15	554.77
Ulva lactuca	2	2	318.32	632.03
Ulva lactuca	2	4	292.37	620.39
Ulva lactuca	2	6	279.03	628.78
Ulva lactuca	2	8	269.03	632.73
Ulva lactuca	2	10	262.57	648.57
Ulva lactuca	2	12	258.2	653.24
Ulva lactuca	2	14	250.48	657.72
Bryopsis hypnoides	1	-30	542.308	921.918
Bryopsis hypnoides	1	0	340.83	380.25
Bryopsis hypnoides	1	2	345.33	389.87
Bryopsis hypnoides	1	4	341.47	389.12
Bryopsis hypnoides	1	6	341.06	384.16
Bryopsis hypnoides	1	8	347	394.64
Bryopsis hypnoides	1	10	337.62	391.07
Bryopsis hypnoides	1	12	339.86	393.98
Bryopsis hypnoides	1	14	338.23	391.71
Bryopsis hypnoides	2	-30	218.035	544.428
Bryopsis hypnoides	2	0	169.78	229.63
Bryopsis hypnoides	2	2	176.5	231.29
Bryopsis hypnoides	2	4	166.72	227.25
Bryopsis hypnoides	2	6	168.65	237.51
Bryopsis hypnoides	2	8	170.86	247.18
Bryopsis hypnoides	2	10	168.65	245.03
Bryopsis hypnoides	2	12	163.48	234.85
Bryopsis hypnoides	2	14	172.78	256.5
Bryopsis hypnoides	3	-30	472.752	1171.75
Bryopsis hypnoides	3	0	441.94	719.25
Bryopsis hypnoides	3	2	437.2	738.72
Bryopsis hypnoides	3	4	434.88	749.9
Bryopsis hypnoides	3	6	432.23	751.44
Bryopsis hypnoides	3	8	434.96	756.33
Bryopsis hypnoides	3	10	427.68	763.45
Bryopsis hypnoides	3	12	426.34	768.01
Bryopsis hypnoides	3	14	423.73	777.27

## Sheet: Fig 5
Time	Replicate	PAR	Fo	Fm
-30	1	0	148.72	710
-30	1	280	179.735	841.66
-30	1	558	161.81	736.28
-30	1	842	170.39	816.61
-30	1	1116	200.59	880.445
-30	1	1395	184.35	873.795
-30	1	1665	193.38	855.58
-30	1	1948	136.47	571.58
-30	2	0	170.045	778.67
-30	2	280	174.65	836.97
-30	2	558	238.785	1090.11
-30	2	842	141.19	667.45
-30	2	1116	246.075	1118.69
-30	2	1395	113.67	554.625
-30	2	1665	105.755	501.255
-30	2	1948	158.03	767.16
-30	3	0	155.665	683
-30	3	280	121.89	586.175
-30	3	558	116.435	550.085
-30	3	842	154.185	735.725
-30	3	1116	168.91	787.045
-30	3	1395	157.75	753.53
-30	3	1665	145.725	683.805
-30	3	1948	93.235	437.675
0	1	0	145.02	628.35
0	1	280	291.86	658.64
0	1	558	299.82	512.87
0	1	842	343.49	564.65
0	1	1116	388.76	586.39
0	1	1395	381.38	566.5
0	1	1665	372.15	515.46
0	1	1948	223	302.07
0	2	0	187.2	805.32
0	2	280	314.47	739.36
0	2	558	540.99	979.46
0	2	842	406.96	634.21
0	2	1116	550.35	846.13
0	2	1395	238.04	345.26
0	2	1665	236.47	319.04
0	2	1948	325.31	453.69
0	3	0	159.42	659
0	3	280	222.96	502.75
0	3	558	269.97	457.48
0	3	842	379.37	613.41
0	3	1116	369.5	566.28
0	3	1395	336.48	518.89
0	3	1665	300.46	421.54
0	3	1948	200.64	278.28
2	1	0	142.47	637.29
2	1	280	261.22	688.96
2	1	558	263.5	534.78
2	1	842	302.05	586.57
2	1	1116	338.91	601.95
2	1	1395	332.39	583.93
2	1	1665	335.18	538.65
2	1	1948	205.61	322.43
2	2	0	183.13	819
2	2	280	281.68	754.5
2	2	558	465.85	1025.66
2	2	842	338.95	643.75
2	2	1116	482.36	871.5
2	2	1395	209.02	358.6
2	2	1665	206.87	324.35
2	2	1948	289.39	473.56
2	3	0	156.77	666.96
2	3	280	197.34	521.72
2	3	558	226.6	473.28
2	3	842	320.66	629.26
2	3	1116	316.53	582.77
2	3	1395	290.2	531.75
2	3	1665	269.5	439.31
2	3	1948	179.73	286.99
4	1	0	141.07	638.02
4	1	280	239.22	693.32
4	1	558	234.95	541.07
4	1	842	268.34	586.67
4	1	1116	301.15	604.31
4	1	1395	295	577.88
4	1	1665	300.71	535.11
4	1	1948	183	311.73
4	2	0	183.37	827.91
4	2	280	259.93	775.27
4	2	558	420.01	1041.14
4	2	842	294.27	654.96
4	2	1116	437.29	877.76
4	2	1395	188.22	360.93
4	2	1665	182.74	323.75
4	2	1948	257.61	469.3
4	3	0	156.25	681.2
4	3	280	180.51	533.75
4	3	558	200.32	476.23
4	3	842	282.43	635.93
4	3	1116	281.65	591.56
4	3	1395	259.37	539.22
4	3	1665	243.01	445.99
4	3	1948	159.88	283.73
6	1	0	142.09	641.16
6	1	280	226.22	707.11
6	1	558	215.48	536.96
6	1	842	248.13	585.86
6	1	1116	276.73	593.57
6	1	1395	274.85	582.37
6	1	1665	278.21	533.48
6	1	1948	168.5	305.46
6	2	0	186.05	825.73
6	2	280	244.58	766.39
6	2	558	387.42	1028.9
6	2	842	267.14	641.21
6	2	1116	402.62	865.7
6	2	1395	173.41	351.92
6	2	1665	168.22	319.92
6	2	1948	239.41	465.55
6	3	0	157.3	677.86
6	3	280	171.77	536.64
6	3	558	183.65	478.52
6	3	842	258.93	635.39
6	3	1116	260.9	582.88
6	3	1395	236.46	534.16
6	3	1665	225.09	437.25
6	3	1948	147.57	283.19
8	1	0	141.57	635.8
8	1	280	214.04	705.22
8	1	558	201.21	533.67
8	1	842	230.12	585.2
8	1	1116	256.55	589.97
8	1	1395	258.46	583.82
8	1	1665	260.97	541.03
8	1	1948	157.01	303.51
8	2	0	183.16	829.07
8	2	280	232.09	774.94
8	2	558	360.48	1027.13
8	2	842	246.98	641.72
8	2	1116	377.14	868.95
8	2	1395	162.47	359.45
8	2	1665	157.95	316.82
8	2	1948	223.48	471.15
8	3	0	155.28	683.61
8	3	280	162.67	547.04
8	3	558	169.42	485.14
8	3	842	238.95	627.48
8	3	1116	240.47	586.71
8	3	1395	221.94	528.85
8	3	1665	211.62	443.31
8	3	1948	137.21	286.47
10	1	0	142.4	642.1
10	1	280	205.05	711.41
10	1	558	192.79	531.4
10	1	842	219.16	580.41
10	1	1116	245.11	596.69
10	1	1395	244.61	586.73
10	1	1665	252.86	537.16
10	1	1948	151.7	302.08
10	2	0	185.84	832.43
10	2	280	223.32	773.41
10	2	558	345.21	1023.99
10	2	842	232.73	638.93
10	2	1116	362.09	876.66
10	2	1395	154.87	355.73
10	2	1665	150.67	317.58
10	2	1948	213.04	467.2
10	3	0	157.12	669.03
10	3	280	156.19	542.92
10	3	558	161.25	481.89
10	3	842	227.03	633.85
10	3	1116	231.42	586.61
10	3	1395	210.87	533.9
10	3	1665	203.75	447.24
10	3	1948	131.57	284.7
12	1	0	142.52	638.77
12	1	280	200.84	708.22
12	1	558	186.24	530.71
12	1	842	209.14	580.07
12	1	1116	236.06	591.5
12	1	1395	234.87	585.02
12	1	1665	246.04	540.39
12	1	1948	149.06	306.17
12	2	0	187.29	834.45
12	2	280	216.53	770.91
12	2	558	330.47	1033.33
12	2	842	223.26	633.77
12	2	1116	351.25	880.62
12	2	1395	149.5	359.07
12	2	1665	145.69	324.63
12	2	1948	206.31	476.54
12	3	0	156.66	674.87
12	3	280	152.43	545.33
12	3	558	155.62	481.09
12	3	842	219.16	641.27
12	3	1116	221.51	583.52
12	3	1395	203.25	536.43
12	3	1665	196.77	441.06
12	3	1948	127.16	290.7
14	1	0	141.61	646.78
14	1	280	195.84	712.59
14	1	558	179.87	541.22
14	1	842	201.95	584.51
14	1	1116	227.26	600.44
14	1	1395	226	592.98
14	1	1665	238.62	547.69
14	1	1948	142.23	310.82
14	2	0	186.56	832.1
14	2	280	211.35	764.86
14	2	558	322.62	1037.47
14	2	842	215.98	641.04
14	2	1116	340.59	890.8
14	2	1395	145.19	358.54
14	2	1665	140.26	321.75
14	2	1948	199.85	481.49
14	3	0	155.5	679.81
14	3	280	147.09	541.87
14	3	558	148.56	475.17
14	3	842	210.03	628.85
14	3	1116	213.26	589.91
14	3	1395	196.36	551.26
14	3	1665	192.58	455.43
14	3	1948	123.73	291.11
16	1	0	143.03	637.74
16	1	280	193.63	709.57
16	1	558	178.21	537.93
16	1	842	198.98	588.13
16	1	1116	223.94	601.95
16	1	1395	225.27	595.48
16	1	1665	233.17	548.46
16	1	1948	141.66	315.24
16	2	0	186.29	826.81
16	2	280	207.51	770.17
16	2	558	315.21	1038.58
16	2	842	210.2	642.82
16	2	1116	332.04	890.49
16	2	1395	141.82	363.78
16	2	1665	136.9	325.37
16	2	1948	195.07	472.72
16	3	0	156.68	677.15
16	3	280	144.75	542.76
16	3	558	146.7	481.15
16	3	842	206.14	640.96
16	3	1116	209.5	593.64
16	3	1395	193.32	547.77
16	3	1665	188.64	460.37
16	3	1948	120.71	294.21

## Sheet: Fig 6
Time of exposure	PAR	Fo	Fm
0	0	94.49	275.1
0	100	120.68	329.22
0	251	132.81	408.54
0	401	152.34	461.36
0	543	152.32	413.97
0	687	207.25	590.28
0	821	180.04	452.23
0	951	153.91	401.84
0	0	136.33	340.03
0	100	153.36	420.13
0	251	198.19	539.33
0	401	192.48	542.62
0	543	205.56	596.79
0	687	196.12	544.12
0	821	228.9	639.15
0	951	116.09	319.94
0	0	149.56	414.88
0	100	109	272
0	251	139.32	363.96
0	401	180	540.22
0	543	139.13	386.55
0	687	194.96	497.08
0	821	267.32	731.11
0	951	141.13	396.1
0	951	157.79	430.22
0	0	113.94	307.7
0	100	169.56	443.88
0	251	189.07	571.55
0	401	204.08	549.56
0	543	201.39	537.1
0	687	168.51	508.18
0	821	103.45	311.47
0	0	115.85	304.71
0	100	212.25	561.33
0	251	205.36	566.07
0	401	102.87	293.2
0	543	190.15	517
0	687	154.09	375.62
0	821	125.63	356.01
0	951	138.42	380.25
0	0	127.06	367.75
0	100	173.21	437.85
0	251	157.22	393.52
0	401	199.47	600.04
0	543	198.57	591.54
0	687	178.4	513.96
0	821	147.75	437.66
0	951	127.61	370.09
0	0	150.08	445.79
0	100	210.7	576.16
0	251	176.07	471.49
0	401	160.56	437.96
0	543	256.65	655.24
0	687	237.52	687.53
0	821	252.28	664.66
0	951	137.11	374.12
0	0	134.85	383
0	100	169.27	451.23
0	251	133.75	375.83
0	401	160.04	425.89
0	543	134.09	363
0	687	108.05	292.54
0	821	143.02	421.3
0	951	72.78	197.4
7.5	0	127.08	351.895
7.5	100	155.535	404.785
7.5	251	102.81	270.435
7.5	401	123.88	297.45
7.5	543	118.18	285.425
7.5	687	98.86	232.875
7.5	821	128.95	328.065
7.5	951	67.625	162.795
15	0	131.625	356.07
15	100	178.12	441.68
15	251	167.185	397.29
15	401	121.755	296.325
15	543	218.05	480.855
15	687	184.72	436.32
15	821	217.415	457.665
15	951	111.43	239.165
22.5	0	110.205	313.645
22.5	100	161.23	365.785
22.5	251	139.115	304.095
22.5	401	162.355	412.005
22.5	543	156.125	376.99
22.5	687	147.905	327.77
22.5	821	111.855	255.49
22.5	951	89.86	200.69
30	0	111	270.36
30	100	174.545	406.84
30	251	171.205	384.22
30	401	75.155	177.11
30	543	128.975	278.345
30	687	113.85	213.01
30	821	100.69	215.01
30	951	108.97	219.79
37.5	0	96.26	246.595
37.5	100	146.72	329.73
37.5	251	136.01	335.53
37.5	401	157.905	327.6
37.5	543	140.975	279.41
37.5	687	130.385	289.06
37.5	821	81.565	177.465
37.5	951	102.365	204.085
45	0	135.475	358.145
45	100	86.11	194.405
45	251	114.37	238.215
45	401	142.625	328.94
45	543	101.875	211.45
45	687	143.645	264.1
45	821	217.81	425.255
45	951	98.265	191.72
52.5	0	107.5	250.025
52.5	100	139.03	317.85
52.5	251	147.82	324.365
52.5	401	148.535	322.95
52.5	543	142.72	294.82
52.5	687	141.855	288.1
52.5	821	161.565	310.045
52.5	951	77.35	151.29
60	0	93.73	265.545
60	100	108.67	251.945
60	251	96.965	243.02
60	401	100.58	229.46
60	543	109.775	211.52
60	687	136.035	265.885
60	821	119.46	212.585
60	951	120.735	205.3
